# MG53 preserves neuromuscular junction integrity and alleviates ALS disease progression

Jianxun Yi<sup>1,2</sup>, Ang Li<sup>1,2</sup>, Xuejun Li<sup>1,2</sup>, Ki Ho Park<sup>3</sup>, Xinyu Zhou<sup>3</sup>, Frank Yi<sup>3</sup>, Yajuan Xiao<sup>2</sup>, Dosuk Yoon<sup>2</sup>, Tao Tan<sup>3</sup>, Lyle W. Ostrow<sup>4</sup>, Jianjie Ma<sup>3\*</sup> and Jingsong Zhou<sup>1,2\*</sup>

<sup>1</sup> Department of Kinesiology, College of Nursing and Health Innovation, University of Texas at Arlington.

<sup>2</sup> Department of Physiology, Kansas City University of Medicine and Biosciences.

<sup>3</sup> Department of Surgery, Davis Heart and Lung Research Institute, The Ohio State University.

<sup>4</sup> Department of Neurology, School of Medicine, Johns Hopkins University.

\*Corresponding authors. Emails: [Jingsong.zhou@uta.edu](mailto:Jingsong.zhou@uta.edu) (J.Z.); [Jianjie.ma@osumc.edu](mailto:Jianjie.ma@osumc.edu) (J.M.)

**Abstract:** Respiratory failure from progressive respiratory muscle weakness is the most common cause of death in amyotrophic lateral sclerosis (ALS). Defects in neuromuscular junctions (NMJs) and progressive NMJ loss occur at early stages, thus stabilizing and preserving NMJs represents a potential therapeutic strategy to slow ALS disease progression. Here we demonstrate that NMJ damage is repaired by MG53, an intrinsic muscle protein involved in plasma membrane repair. Compromised diaphragm muscle membrane repair and NMJ integrity are early pathological findings in ALS. Diaphragm muscles from ALS mouse models show increased susceptibility to injury and intracellular MG53 aggregation, which is also a hallmark of human muscle samples from ALS patients. We show that systemic administration of recombinant human MG53 protein (rhMG53) in ALS mice protects against injury to diaphragm muscle, preserves NMJ integrity, and slows ALS disease progression. As MG53 is present in circulation in rodents and humans under physiological conditions, our findings provide proof-of-concept data supporting MG53 as a potentially safe and effective therapy to mitigate ALS progression.

## Introduction

Amyotrophic lateral sclerosis (ALS) is a fatal neuromuscular disease characterized by progressive motor neuron loss and muscle atrophy(1, 2). Progressive respiratory muscle weakness is a main cause of morbidity and eventual death(3, 4). ALS appears to be a combination of “dying-

1 forward” and/or “dying-back” pathophysiological processes, starting in cortical motor neurons and  
2 glia, or at the muscle and NMJ(5-14). It is possible that the balance of these processes differs in  
3 subsets of ALS patients, and several mechanisms have been proposed for how they may interrelate.  
4 For example, NMJ degeneration is associated with mitochondrial dysfunction in ALS(15-19),  
5 which involves bidirectional crosstalk between myofibers and neuron(6, 8, 9, 15-19). Therapeutic  
6 approaches that sustain NMJ integrity and muscle function could slow disease progression. Thus,  
7 it is critical to understand the molecular mechanisms associated with NMJ degeneration in ALS.

8 During respiration, the diaphragm constantly undergoes contraction-relaxation, a process that  
9 leads to injury to the muscle membrane. Inadequate repair of injury to the sarcolemma can disrupt  
10 NMJ integrity and contribute to diaphragm wasting in ALS. MG53, a member of the tripartite  
11 motif (TRIM) protein family(20), was identified as an essential component of the cell membrane  
12 repair machinery(21-24). Genetic ablation of MG53 results in defective membrane repair and  
13 tissue regenerative capacity(21, 22, 25, 26). A series of studies have shown that recombinant  
14 human MG53 (rhMG53) protein protects various cell types against membrane disruption when  
15 applied to the extracellular environment, and ameliorates pathology associated with muscular  
16 dystrophy(27), acute lung injury(28), myocardial infarction(29), acute kidney injury(30), and  
17 ischemic brain damage(31) in animal models.

18 In this study, we identify NMJ as an active site of injury-repair by MG53 and show that  
19 compromised diaphragm muscle membrane repair occurs prior to symptom onset in ALS mice.  
20 Oxidative stress associated with mitochondrial dysfunction in ALS muscle leads to formation of  
21 MG53 protein aggregates and disruption of MG53-mediated membrane repair. Diaphragm  
22 muscles from ALS mouse models show increased susceptibility to injury and intracellular MG53  
23 aggregation, which is also seen in human muscle samples from ALS patients. Remarkably,  
24 systemic application of rhMG53 in ALS mice protects against injury to the diaphragm, preserves  
25 integrity of NMJ, and significantly alleviates ALS disease progression.

## 26 **Results**

27 *Increased susceptibility to diaphragm membrane injury is an early finding in SOD1(G93A) mice*

28 Transgenic mice expressing the human SOD1<sup>G93A</sup> mutation (G93A) are a highly characterized  
29 and widely used model for preclinical investigation of pathogenic mechanisms in ALS(32, 33).  
30 As illustrated in **Figure 1A**, we performed intraperitoneal (IP) injections of Evans blue (EB) dye

1 to wild type (WT) and G93A littermates at 2 months of age (pre-symptomatic stage, prior to ALS  
2 onset)(34). We harvested the diaphragm muscles 16 hours later, immediately after the mice  
3 performed a 30 min running protocol (18 m/min, 15° downhill), and evaluated EB retention within  
4 muscle myofibers. The amount of EB fluorescence measures the extent of muscle membrane  
5 leakage. The G93A diaphragm muscles displayed significantly higher EB levels under resting  
6 condition compared to WT (**Figure 1B**). The 30 min downhill protocol further dramatically  
7 enhanced EB accumulation in the G93A diaphragm (**Figure 1C**), but there was no change in the  
8 WT mice. The same exercise-induced excessive membrane damage was also observed in the  
9 tibialis anterior (TA) muscle derived from the G93A mice (**Figure S1**). Measurement of serum  
10 creatine kinase (CK) showed significant elevation in G93A mice after down-hill running (**Figure**  
11 **1D**).

12 We performed MG53 immunostaining in diaphragms derived from WT and G93A mice  
13 immediately after running. The whole-mount preparation (longitudinal view) (**Figure 1E**)  
14 revealed distinct segments with increased MG53 in the G93A diaphragm, which were rarely seen  
15 in the WT diaphragm. In transverse sections (**Figure 1F**), the increased MG53 staining clearly  
16 localized to the sarcolemma in some G93A myofibers (*red arrows*), in contrast to the  
17 predominantly intracellular distribution of MG53 in WT myofibers. This observation is consistent  
18 with the notion that G93A diaphragm muscles are susceptible to exercise-induced injury, and  
19 endogenous MG53 localizes to the areas of membrane damage in ALS muscle, consistent with its  
20 known functions in promoting plasma membrane repair.

21 Immunoblotting showed elevated MG53 levels in sera derived from the G93A mice after  
22 running (**Figure 1G** and **Figure S2**), which correlates with the increases in serum CK levels  
23 (**Figure 1D**). A similar correlation between serum CK and MG53 measurements was reported in  
24 *mdx* mice, a model of Duchene muscular dystrophy with compromised muscle membrane  
25 repair(27). Since these striking diaphragm and tibialis anterior myofiber injuries in the G93A mice  
26 (2-month old) occur prior to the onset of ALS symptoms, these findings suggest that fragility of  
27 skeletal muscle represents an early pathological event in ALS.

28 *NMJ is an active site of injury-repair by MG53 under physiological conditions that is lost in ALS*

29 We showed previously that segmented mitochondrial defects appeared locally at NMJs in the  
30 G93A mice(18, 19). This prompted us to examine whether the NMJ itself is an active site of  
31 contraction-induced membrane injury, and if MG53 plays a role in repair of NMJ injury.

1 Immediately after the 30 min running, freshly isolated flexor digitorum brevis (FDB) myofibers  
2 from 2-month old mice were fixed for staining with  $\alpha$ -Bungarotoxin (BTX) to mark NMJ and anti-  
3 MG53 antibodies. We found that MG53 accumulated at the NMJ area and formed patches in WT  
4 myofibers (n = 130, 4 mice) (**Figure 2A, left**), suggesting that MG53 contributes to the  
5 maintenance of NMJ integrity under physiologic conditions. While MG53 also accumulated at the  
6 NMJ area in G93A myofibers (n = 109, 3 mice), there were also separate intracellular MG53  
7 aggregates in proximity to NMJs in about 10% of G93A myofibers (**Figure 2A, right**, see also  
8 **Figure S3**). Moreover, FDB myofibers derived from the G93A mice at an advanced stage of ALS  
9 (4-month old) showed increased abnormal MG53 aggregation near NMJs even without running  
10 (**Figure 2B** and **Figure S4**). Such MG53 aggregation suggests potential impaired tissue-repair  
11 capacity that may manifest into NMJ degeneration during ALS disease progression.

12 Using the entry of a cell-impermeable fluorescent dye FM 1-43 as a measure of muscle  
13 myofiber integrity(21, 35), we tested the possibility that ALS-associated muscle injury originates  
14 focally at NMJs. **Figure 2C** shows an overlay of FM 1-43 and BTX, indicating FM 1-43 enriches  
15 at NMJ when applied to the medium. In WT myofibers, FM 1-43 was restricted to the NMJ and  
16 there were barely any FM 1-43 signals inside myofibers after a 20 min dye incubation (**Figure**  
17 **2D**). In contrast, 59%  $\pm$  7% of FDB myofibers from three 4-month old G93A mice showed  
18 intracellular uptake of FM 1-43 dye, which formed a gradient centered around the NMJ (**Figure**  
19 **2E**), indicating that FM 1-43 dye entered the cells preferentially through injured NMJs.

20 We next examined whether exercise could exacerbate membrane injury at NMJs of G93A  
21 muscle. For this purpose, three pairs of 2-month old WT and G93A littermate mice performed the  
22 running protocol for 30 minutes. 72%  $\pm$  2% of G93A FDB myofibers showed NMJ-centered  
23 intracellular FM 1-43 gradient, whereas only 6%  $\pm$  2% WT myofibers exhibited this phenomenon  
24 (P < 0.001). These data substantiate the finding that NMJs are focally more susceptible to injury  
25 than other regions of the sarcolemma, and exercise-induced NMJ injury is dramatically  
26 exacerbated in the G93A ALS mice.

27 In skeletal muscle, the cell surface membrane travels deep into the myofibril forming  
28 transverse tubules (T-tubules). Freshly isolated FDB myofibers were incubated with BTX,  
29 CellMask, and TMRE to locate the NMJs, T-tubule network and record mitochondrial potentials,  
30 respectively (**Figure 2F**). Normal polarized mitochondria and organized T-tubule networks were  
31 observed in WT myofibers (**Figure 2F, left**). Myofibers derived from the 4-month old G93A mice

1 showed fully depolarized mitochondria at NMJs (**Figure 2F**, *right*), and those derived from the 2-  
2 month old G93A mice showed partially depolarized mitochondria (**Figure 2F**, *middle*).  
3 Remarkably, disorganized T-tubule networks were observed near the NMJs in both 2- and 4-month  
4 old G93A myofibers, including regional loss of T-tubules (hollow area under the NMJ) and  
5 formation of enlarged spheres. Pearson's Chi-squared tests demonstrated a significant correlation  
6 between T-tubule disruption and mitochondrial depolarization at the NMJ in both 2-month ( $P <$   
7  $0.0001$ ) and 4-month ( $P < 0.01$ ) G93A myofibers (**Figure 2G**). These data confirm that  
8 mitochondrial dysfunction is associated with the disruption of cell membrane integrity at NMJs of  
9 the ALS muscle.

10 We and others have shown that mitochondrial dysfunction is associated with enhanced reactive  
11 oxygen species (ROS) production in the ALS mouse muscle(14, 16, 36), which could impact the  
12 intrinsic membrane repair function of MG53(37, 38). Using our established live cell imaging  
13 method, we examined whether oxidative stress impact the traffic of MG53 vesicles inside C2C12  
14 cells overexpressing GFP-MG53(39). The 2D x-y time-lapse images were continuously recorded  
15 for 10 seconds in the presence or absence (basal) of 1 mM H<sub>2</sub>O<sub>2</sub>. Representative images at 0 sec  
16 (0s, pseudo color green), 5 sec (5s, pseudo color red) and 10 sec (10s, pseudo color red) were  
17 selected for generating the overlay images (**Figure 2H**). The overlay images of 0s with 5s or 0s  
18 with 10s provide a visualization of GFP-MG53 vesicle dynamics. In the overlay images, non-  
19 moving vesicles are marked by yellow color (completely overlap), while moving vesicles are  
20 indicated by the red and green colors (no overlap). Note that there is almost no detectable  
21 movement of GFP-MG53 vesicles in the presence of H<sub>2</sub>O<sub>2</sub>, while moving GFP-MG53 vesicles  
22 were detected under basal condition.

### 23 *Impaired MG53 membrane repair function is a common pathological feature of ALS muscle*

24 With the support of the *Target ALS Human Postmortem Tissue Core*, we obtained paraffin-  
25 embedded diaphragm and psoas muscle sections from both sporadic and familial ALS decedents,  
26 and non-ALS controls (**Table S1** and **Table S2**). Both longitudinal and transverse sections of  
27 human ALS diaphragm and psoas muscle showed dramatic abnormal sarcolemmal and  
28 intracellular MG53 aggregates. In contrast, the muscle samples of non-neurological control  
29 decedents showed only a few scattered MG53 aggregates (**Figure 3A** and **Figure S5**). It is not  
30 unexpected to see a few MG53 aggregates in non-ALS muscle, as MG53-mediated membrane  
31 repair also occurs in normal conditions, but to a much lesser extent. As shown in **Figure 3B**, this

1 same staining pattern was observed in longitudinal (**Figure 3B, left**) and transverse sections  
2 (**Figure 3B, right**) of diaphragm muscle from the 4-month old G93A mice. The abnormal  
3 intracellular MG53 aggregation was observed in all 4-month old G93A muscles examined,  
4 including extensor digitorum longus (EDL), soleus, and tibialis anterior (TA) (**Figure S6A**). The  
5 data from both familial and sporadic ALS decedents and the G93A mouse model suggest that  
6 compromised MG53-mediated muscle membrane repair function could be a common pathology  
7 in ALS.

8 Enhanced EB retention in the diaphragm (**Figure 3C**) and TA muscles (**Figure S6B**) was also  
9 observed in 4-month old G93A mice without running, indicating that muscle injury and fragility  
10 continue during ALS progression. Interestingly, the serum level of MG53 in the G93A mice at this  
11 late stage of ALS was lower compared with the WT littermates under resting conditions (**Figure**  
12 **3D**). As MG53 is a muscle-derived protein, the reduced serum MG53 level likely reflect the  
13 progressive loss of muscle mass. It is also possible that the formation of intracellular MG53  
14 aggregates sequesters MG53, limiting its release into circulation. Nevertheless, these findings  
15 suggest that endogenous MG53 no longer can sustain the membrane repair function as ALS  
16 progresses.

#### 17 *Recombinant human (rhMG53) preserves the membrane integrity of diaphragm in G93A mice*

18 Using an established protocol for evaluating the muscle cell membrane repair function  
19 following laser-induced cell membrane damage(21, 35), we conducted *in vitro* studies to test (1)  
20 whether G93A myofibers showed higher laser-induced fragility compared to WT myofibers, and  
21 (2) whether exogenous administration of rhMG53 could improve membrane integrity of G93A  
22 myofibers. A small area of the FDB myofiber (12 $\mu$ m X 12 $\mu$ m) was exposed to a high intensity UV  
23 laser to cause localized cell membrane injury allowing the entry of FM 1-43 dye. As shown in  
24 **Figure 4A**, G93A myofibers (4-month old) showed more intracellular accumulation of FM 1-43  
25 compared with WT, indicating fragility and impaired cell membrane repair mechanism. 10  $\mu$ g/ml  
26 of rhMG53 applied to the culture medium reduced the intracellular accumulation of FM 1-43 in  
27 the G93A myofibers. Application of the same amount of bovine serum albumin (BSA) was  
28 ineffective. The time-dependent FM 1-43 accumulation following laser-induced injury is shown  
29 in **Figure 4B**, demonstrating that extracellular application of rhMG53 improved the membrane  
30 repair function of the G93A muscle. Furthermore, G93A myofibers showed reduced mitochondrial  
31 ROS production after incubation with rhMG53 (2  $\mu$ g/ml) in the medium for 12 hours (**Figure 4C**).

1 We next tested whether intravenous (IV) administration of 2 mg/kg rhMG53-Alexa (or BSA-  
2 Alexa as a control) in the G93A mice - immediately prior to running, attenuates diaphragm  
3 membrane injury. The dosage of rhMG53 was determined based on our previous publications with  
4 rhMG53 in preservation of membrane integrity in multiple organs(28, 30, 31). After running,  
5 diaphragm muscles were immediately collected for live cell imaging of Alexa and EB  
6 simultaneously. As shown in **Figure 4D**, mice treated with rhMG53-Alexa showed prominent  
7 membrane patches of MG53-Alexa, indicating that rhMG53-Alexa targets to injured diaphragm  
8 muscles, similar to the previous study with the *mdx* mice(27). In contrast, diaphragm derived from  
9 the G93A mice receiving BSA-Alexa showed a diffuse pattern, indicating that BSA-Alexa could  
10 not form membrane patches (**Figure 4E**). Compared with BSA-Alexa treated mice, the proportion  
11 of myofibers positive for intracellular accumulation of EB was significantly reduced in the  
12 diaphragm muscles from rhMG53-Alexa treated mice (**Figure 4F**), confirming the efficacy of  
13 rhMG53 to preserve diaphragm membrane integrity *in vivo*.

#### 14 *Systemic application of rhMG53 preserved NMJ integrity and extended the life span of G93A mice*

15 Our ultimate goal is to develop rhMG53 as a treatment for ALS, which would be initiated after  
16 diagnosis – and thus after symptom onset – to ALS patients. Therefore, we evaluated the efficacy  
17 of rhMG53 administration to G93A mice after ALS onset by starting the treatment at the age of 3  
18 months(40). We first adapted a method to quantify NMJ innervation in diaphragm muscle(41) of  
19 adult mice. **Figure 5A** shows a representative image of a mouse diaphragm stained with anti-  
20 neurofilament (NF) antibodies (red fluorescence) and BTX (green fluorescence). By changing the  
21 focal plane and performing a 3D-scan of a zoomed-in area, we could examine NMJ in the entire  
22 diaphragm. The 3D-scan projection allowed us to distinguish well innervated NMJs from partially  
23 innervated or denervated NMJ (**Figure 5B**). Then, ten G93A mice (3-month old) were divided  
24 into two cohorts, one received IV injection of rhMG53 (2 mg/kg, daily), and the other received  
25 saline for 2 weeks. **Figure 5C** shows representative 3D-projection images of the diaphragm muscle  
26 from rhMG53 and saline treated mice. The innervated NMJ area was defined by the overlapping  
27 area between BTX and NF signals. Quantitative analyses of NMJ innervation are presented in  
28 **Figure 5D**, demonstrating that rhMG53 treatment could significantly preserve NMJ integrity,  
29 maintain well innervated and partially innervated NMJs, as well as reduce the proportion of  
30 denervated NMJs compared with saline-treated controls. In a separated experiment, motor neurons  
31 in the anterior horn region (Nissl staining-positive with diameter larger than 25  $\mu\text{m}$ ) were counted

1 (Figure 5E and 5F). The 2-week rhMG53 treatment significantly preserved the number of motor  
2 neurons in spinal cords from the G93A mice (rhMG53 vs saline,  $P < 0.01$ ) (Figure 5G), suggesting  
3 that this treatment also alleviated motor neuron degeneration.

4 Endogenous MG53 is predominantly expressed in striated muscle(21, 42), but not in  
5 neurons(31). Under physiological condition, MG53 in circulation does not cross the brain blood  
6 barrier(31). Therefore, it was unlikely that rhMG53 in circulation directly reached the motor  
7 neuron in spinal cord to protect its function. As ALS appears to be a combination of “dying-  
8 forward” and/or “dying-back” pathophysiological processes, and the NMJ is the critical site for  
9 this bidirectional crosstalk between motor neurons and myofibers, we speculate that the effects of  
10 rhMG53 on preserving anterior horn motor neuron cell bodies is likely secondary to the  
11 preservation of NMJ integrity, which slows the dying back process. Contributions from a direct  
12 effect on motor neurons remain possible.

13 The short half-life of rhMG53 in circulation (~1 hour) may present a hurdle for treating chronic  
14 tissue injuries in ALS(30, 43). PEGylation is a well-established method for increasing the half-life  
15 of therapeutic proteins in circulation (44, 45). Addition of polyethylene glycol (PEG) often reduces  
16 immunogenicity of the PEGylated proteins without a major loss of their biological activity(46-48)  
17 and several PEGylated proteins have reached the market(48, 49). We produced PEGylated  
18 rhMG53 (PEG-rhMG53). As shown in Figure 6A, PEGylation of rhMG53 is successful based on  
19 the oligomerization pattern of the protein run on SDS-PAGE. We previously developed an *in vitro*  
20 assay to evaluate the efficacy of rhMG53 in protecting against membrane damage by measuring  
21 LDH in the extracellular solution of culture cells, as LDH leaks from the cell into the extracellular  
22 solution following cell membrane injury(23, 24, 27, 50). The PEG-modification did not affect the  
23 membrane repair function of rhM53 as the  $EC_{50}$  of LDH release did not change (Figure 6B).  
24 Meanwhile the half-life of PEG-rhMG53 increased in circulation from 0.5 to 12 hours (Figure  
25 6C). This elongated half-life in circulation allowed us to test the PEG-rhMG53 in G93A mice by  
26 IV injection in every other day for a longer period.

27 The PEG-rhMG53 (2 mg/kg, IV) was administered to the G93A mice (3-month old) every  
28 other day for 30 days. Twenty-six G93A littermate mice (from 3 litters, with both genders  
29 included) were divided into two groups, one receiving PEG-rhMG53, and the other receiving  
30 saline as a control. The bodyweights of the PEG-rhMG53 or saline treated mice were recorded.  
31 One-month of PEG-rhMG53 treatment slowed weight loss compared with the saline treated G93A



1 mice (**Figure 6D**). Note that the weight loss of PEG-rhMG53-treated mice accelerated again after  
2 the treatment ended. This is not unexpected, as the half-life of PEG-rhMG53 is only 12 hours in  
3 rodent circulation (**Figure 6C**). This one-month treatment of PEG-rhMG53 also significantly  
4 extended the life span of G93A mice from  $124 \pm 6$  days (saline) to  $137 \pm 9$  days (PEG-rhMG53)  
5 (**Figure 6E**). The endpoint (death) of a G93A mouse was defined by the loss of righting reflex  
6 within 30 sec when the mouse was placed on its side. The survival days of individual treated G93A  
7 mice and the statistics for both genders were listed in **Table S3**. While the cohorts were not  
8 perfectly gender-balanced per litter, the therapeutic benefits of rhMG53 on survival remained  
9 when male and female mice were considered separately (survival increased to  $137 \pm 7$  for male  
10 mice and  $135 \pm 10$  for females), when compared to the saline-treated G93A littermate mice. The  
11 Chi square test further confirmed that the significant difference between PEG-rhMG53 and saline  
12 treated groups is independent of the gender.

13 **Video S1** illustrates that G93A mice receiving one month of PEG-rhMG53 treatment showed  
14 greater mobility compared with saline-treated mice. We tracked the total moving distance of each  
15 mouse during one-minute video recordings. The tracking maps indicate that paralysis was more  
16 advanced in saline-treated mice, and the time period under constrained motion was significantly  
17 shorter in the mice treated with PEG-rhMG53 (**Figure 6F**). In a separate study, we found that 3-  
18 month old G93A mice that received 2-week rhMG53 treatment (2 mg/kg, daily IV injection)  
19 showed reduced collapsing time of the hind limbs during the tail suspension test at the age of 104  
20 days (**Figure 6G**).

## 21 **Discussion**

22 We have demonstrated that muscle membrane fragility and damage are increased in ALS  
23 G93A mice prior to symptom onset and continue to increase throughout the course of the disease.  
24 Furthermore, our study reveals that the site of NMJs are particularly susceptible to injury compared  
25 to the rest of the sarcolemma, and MG53 forms membrane patches at NMJ following modest  
26 exercise training. Thus, MG53 represents an important physiologic component of protection  
27 against injury to the NMJ. Systemic administration of exogenous rhMG53 has beneficial effects  
28 to restore diaphragm muscle repair and NMJ integrity and improved the life span of the G93A  
29 mice. Abnormal intracellular aggregation of MG53 was observed in multiple types of muscles  
30 from the G93A mice. Similarly, the abnormal aggregates were seen in muscle samples from human  
31 ALS decedents with both sporadic and familial forms of ALS.

1 While transient intracellular oxidation initiates MG53-vesicles to form repair-patches(21),  
2 exposure of cells to sustained oxidative stress leads to immobilization of MG53's membrane repair  
3 function(37). It is known that mitochondrial dysfunction in ALS causes intracellular oxidative  
4 stress, thus elevated ROS could impede normal MG53 movement to areas of sarcolemmal damage,  
5 resulting in the observed aggregation and loss of its tissue repair function. A proposed mechanism  
6 underlying the membrane repair defects at the NMJ of ALS is illustrated in **Figure 6H**. Since NMJ  
7 is an active site of neuron-muscle crosstalk, it is conceivable that membrane repair defects initiate  
8 from NMJ. MG53 plays a critical role in maintaining the integrity of NMJ and the muscle  
9 membrane. During ALS progression, mitochondrial dysfunction causes elevated ROS production,  
10 leading to ectopic MG53 aggregation and disruption of MG53's tissue repair function, which could  
11 exacerbate NMJ denervation. Oxidative stress, muscle membrane damage and NMJ denervation  
12 could form a vicious cycle promoting muscle wasting and neuronal death in ALS. We demonstrate  
13 that exogenously administered rhMG53 forms repair-patches and reduces membrane leakage of  
14 the ALS diaphragm muscle. It is possible that reduced cell membrane leakage lowers the energy  
15 demand and subsequent mitochondrial ROS production, alleviating this vicious cycle to preserve  
16 the integrity of NMJ and muscle membrane, which could also slow down the dying-back process  
17 of motor neuron degeneration.

18 IV administration of rhMG53 or PEG-rhMG53 to the G93A mice after disease onset preserved  
19 innervation of the diaphragm and prolonged the lifespan. Studies in mice, rats, and dogs reported  
20 no observable toxic effects with long-term administration of rhMG53(27, 30, 51). While we  
21 demonstrate that repetitive IV administration of the PEG-rhMG53 has beneficial effects on G93A  
22 ALS mice, further studies are still required to establish the safety profile of the chemically  
23 modified rhMG53, and to test the therapeutic efficacy in other ALS animal models.

24 In rodents and humans, MG53 is present at low levels in blood circulation under physiologic  
25 conditions. Given that we observed higher circulating levels in the G93A mice than wild-type  
26 littermates, and a correlation with serum CK measurements, it is possible that ALS patients also  
27 show different levels of circulating MG53. We intend to examine this further in future studies,  
28 including the possibilities that (1) a one-time measurement of MG53 early in disease course could  
29 be useful as a "prognostic biomarker" of rate of disease progression, (2) a "predictive biomarker"  
30 to identify/cohort select patients who might best respond to therapeutic strategies designed to  
31 stabilize/repair damage to myofibers, or (3) a pharmacodynamic biomarker to demonstrate

1 therapeutic effect of treatments to preserve myofiber membrane integrity, including exogenously  
2 administered PEG-rhMG53.

3 The effects of exercise training on ALS progression remains controversial(52, 53), and  
4 diaphragm pacing was found to be associated with reduced survival in ALS patients with  
5 respiratory insufficiency(54-58). Our study with the ALS mice demonstrates that even modest  
6 exercise training leads to increased damage to the diaphragm, which may exacerbate ALS  
7 progression. This appears to be due to the severely compromised membrane repair capacity of the  
8 ALS muscle. Based on this finding, one should be cautious in designing exercise-related protocols  
9 or diaphragm pacing as alternative interventions to mitigate ALS. However, it might suggest that  
10 exercise regimens and/or diaphragm pacing in the presence of exogenously administered rhMG53  
11 could be beneficial.

12 In summary, we have identified defective muscle membrane repair involving MG53 as a  
13 pathological change in ALS mice and postmortem human ALS muscle. Muscle membrane injury  
14 occurs early in the course of ALS and contributes to disruption of NMJs. Our study provides proof-  
15 of-concept data supporting the beneficial effects of rhMG53 in preserving the integrity of NMJ  
16 and muscle cell membrane to alleviate ALS progression. Probing the role of mitochondrial ROS  
17 production in modulating MG53-mediated cell membrane repair may have broader implications  
18 in understanding the basic pathophysiology of ALS.

19

## 20 **Materials and Methods**

### 21 **Animal models**

22 The ALS transgenic mouse model (G93A) with genetic background of B6SJL was originally  
23 generated by Drs. Deng and Siddique's group at Northwestern University(34), which was also  
24 deposited to the Jackson Lab as B6SJL-Tg (SOD1\*G93A). We obtained this colony from Dr. Deng  
25 and maintained it through breeding the B6SJL/G93A male mice with B6SJL/WT female mice. All  
26 experiments were carried out in accordance with the recommendations in the Guide for the Care  
27 and Use of Laboratory Animals of the National Institutes of Health. Protocols on the usage of mice  
28 were approved by the Institutional Animal Care and Use Committee of University of Missouri at  
29 Kansas City, Kansas City University of Medicine and Biosciences and University of Texas at  
30 Arlington. Sprague-Dawley rats (4-month old) were purchased from Charles River Laboratories.

1 Protocol on the usage of rats was approved by the Institutional Animal Care and Use Committee  
2 of the Ohio State University.

### 3 **Isolation of single live FDB muscle fibers (myofibers)**

4 Experimental mice were euthanized by cervical dislocation, and FDB muscles were removed  
5 for enzyme digestion to obtain individual myofibers for functional or biochemical studies (16, 18,  
6 19). Briefly, FDB muscles were digested in modified Krebs solution (0 Ca<sup>2+</sup>) containing 0.2% type  
7 I Collagenase (Sigma), for 1 hour at 37 °C. After digestion, muscles were kept in collagenase-free  
8 Krebs solution (with 2.5 mM Ca<sup>2+</sup> and 10 mM glucose) at 4°C and used for studies within 24 hours.

### 9 **Evaluation of T-tubule network integrity and mitochondrial membrane potential at NMJ**

10 Freshly isolated FDB myofibers were seeded in laminin (Santa Cruz sc-29012) coated glass  
11 bottom dishes and stained with TMRE (1: 3000 dilution from 150 µM stock solution, Invitrogen  
12 T669), BTX-Alexa Fluor 488 (1: 1000 dilution from 1 mg/ml stock solution, Invitrogen B13422)  
13 and CellMask DeepRed (1:1000 dilution from 5 mg/ml stock solution, Invitrogen C10046) for 30  
14 min. The myofibers were washed 5 times with 2.5 mM Ca<sup>2+</sup> Krebs solution before imaging with  
15 confocal microscopy. BTX-Alexa Fluor 488 was excited by 488 nm laser (emission filter 500-550  
16 nm). TMRE was excited by 568 nm laser (emission filter 575-625 nm). CellMask DeepRed was  
17 excited by 633 nm laser (emission filter 640-700 nm).

### 18 **Evaluation of mitochondrial ROS level in live FDB myofibers**

19 The fluorescent dye MitoSOX<sup>TM</sup> Red (M36008, Invitrogen) was used to evaluate mitochondrial  
20 superoxide level in live FDB myofibers. FDB myofibers were incubated with 1 µM MitoSOX<sup>TM</sup>  
21 Red in Krebs solution for 10 min at 37°C. The fluorescence intensity of MitoSOX<sup>TM</sup> Red was  
22 recorded on Leica TCS SP8 confocal microscope (Leica Microsystems Inc., Germany).  
23 MitoSOX<sup>TM</sup> Red was excited by 514 nm laser (emission filter 570-600 nm). All parameters for  
24 imaging collection were kept the same between control and experimental groups, which includes  
25 the power of the laser used, the pinhole, and the gain of the fluorescence recording.

### 26 **Evaluation of membrane repair function in live FDB myofibers**

27 We adapted a laser-induced membrane damage protocol from our early publications(21, 27) to  
28 evaluate the membrane repair function of live myofibers. 2 µM of FM 1-43 fluorescent dye were  
29 added to the medium of freshly isolated FDB myofibers(21, 24) with 50 µM n-benzyl-p-toluene  
30 sulfonamide to prevent myofiber contraction(18, 59). Using the FRAP protocol on the Leica TCS

1 SP8 confocal microscope, a small area of the myofiber (12  $\mu\text{m}$  X 12  $\mu\text{m}$ ) was exposed to a high  
2 intensity laser (488 nm, 50% power) to cause a localized muscle membrane injury. The time-  
3 dependent accumulation of FM 1-43 fluorescent signal inside the myofiber after the laser-induced  
4 membrane injury was recorded every 10 s for 5 min. FM 1-43 was excited by 488 nm laser  
5 (emission filter 550-610 nm). All parameters for imaging collection were kept the same for all  
6 tested myofibers, which includes the power of the laser used, the pinhole, and the gain of the  
7 fluorescence detector. The individual data point of the fluorescent intensity was calculated as (F-  
8  $F_0$ ), in which the background fluorescence ( $F_0$ ) was corrected for each data point.

### 9 **Quantification of membrane integrity of diaphragm muscle**

10 EB dye (1% in PBS, 10 $\mu\text{l/g}$  body weight) was applied to mice via IP injection(27). 16 hours  
11 later, the live diaphragm muscle was removed from the mice and immediately immersed in Krebs  
12 solution for evaluation of the EB fluorescence intensity retained inside myofibers under a confocal  
13 microscope. EB was excited by 633 nm laser (emission filter 640-700 nm). All parameters for  
14 imaging collection were kept the same between control and experimental groups, which includes  
15 the power of the laser used, the pinhole, and the gain of the fluorescence recording.

### 16 **Immunohistochemistry of mouse and human muscle**

17 For whole-mount fixed muscle assay, the intact diaphragm, TA, EDL, and soleus muscles were  
18 dissected from the experimental mice and fixed in either methanol (precooled at -20  $^{\circ}\text{C}$ ) for 10  
19 min or 4% paraformaldehyde (PFA) overnight at 4  $^{\circ}\text{C}$ . For PFA fixed samples, the reaction was  
20 stopped by PBS containing 1% glycine. The samples were then washed with PBS, dehydrated and  
21 rehydrated through a graded series of alcohol. Pre-blocking was done at room temperature for 2  
22 hours in blocking buffer containing 3% goat serum, 3% BSA, 0.1% Tween-20, 0.1% Triton X100,  
23 and 0.1%  $\text{NaN}_3$ . The whole-mount fixed muscle samples were then incubated with primary  
24 antibody at 4  $^{\circ}\text{C}$  overnight (anti-neurofilament: Abcam, ab8135 1:250 dilution; anti-Mg53  
25 antibody: 1:200 dilution (30, 51, 60, 61)). After PBS washing, the samples were incubated for 4  
26 hours with Alexa Fluor conjugated secondary antibodies of the corresponding species/Isotype  
27 (1:1000). The samples were then washed again, cleared in glycerol and mounted in anti-fade  
28 mounting media (Tris buffer containing 60% glycerol and 0.5% N- propyl gallate) for imaging  
29 under confocal microscope. For the NMJ staining, BTX-Alexa Fluor 488 (1:1000 dilution) was  
30 added during the 2<sup>nd</sup> antibodies' incubation.

1 Formalin-fixed, paraffin-embedded slides of post-mortem ALS and non-neurological control  
2 decedent muscle were obtained from the *Target ALS Multicenter Postmortem Tissue Core*. All  
3 decedents underwent standard autopsies with consents for autopsy obtained by next-of-kin after  
4 death, and HIPAA Form 5 exemptions to access and share de-identified clinical data from  
5 decedents. Slides were provided blinded to whether they were from ALS or control autopsies, and  
6 then unblinded after staining and analysis was completed.

7 For paraffin sectioning, muscle samples were fixed in 4% paraformaldehyde (PFA) overnight  
8 at 4 °C, washed with PBS, and dehydrated through a graded series of alcohol. Clearance was done  
9 with xylene and paraffin embedding was carried out under negative pressure for 3 hours. Samples  
10 were cut into 8µm sections for immunostaining. Antigen retrieval was carried out at 95 °C for 20  
11 min in citrate buffer (pH 6.0).

12 For dissociated FDB myofibers, the samples were allowed to attach to laminin (sc-29012)  
13 coated glass bottom dishes for 30 minutes in culture media containing Alexa Fluor coupled BTX  
14 (1:1000) before fixation (4% PFA for 15 minutes at 37 °C). The pre-blocking, primary, and  
15 secondary antibody incubation steps were the same as described above.

## 16 **Immunoblotting assay**

17 The mouse serum samples (1.5 µl each) were resolved in 8.7% SDS polyacrylamide gels and  
18 transferred to a polyvinylidene difluoride (PVDF) membrane and probed with an anti-MG53  
19 antibody 1:2000. Ponceau S staining was used to verify equal loading of the serum samples.  
20 Proteins from mouse TA muscle were extracted with RIPA/protease inhibitors and resolved by  
21 10% SDS-PAGE, then transferred to PVDF membrane and probed with antibodies against MG53  
22 antibody 1:5000, and GAPDH (1:10,000, from CST). Protein bands were visualized with ECL  
23 reagents under ChemiDoc Imaging system (Bio-Rad Laboratory). Band intensity was analyzed  
24 with ImageJ software (NIH, Bethesda, MD).

## 25 **Evaluation of serum creatine kinase (CK) activity**

26 Blood samples (~100µl/mouse) were collected from the tail vein of mice at rest. Then the same  
27 group of mice were subjected to a 30 min running protocol at 18 m/min, 15° downhill. Right after  
28 completion of the running protocol, the blood samples were collected again. The serum was  
29 collected from supernatant after centrifuging the blood samples at 2000g for 10 min at 4°C. Freshly  
30 made serum samples were used to measure CK activity following the protocol provided by Sigma  
31 (MAK-116). Briefly, for each reaction, 10 µl of serum was mixed with 100ul assay buffer, the

1 mixture was then loaded onto a 96 well plate for recording the absorbance at 340nm at time  
2 intervals of 5 min up to 40 min in a plate reader (SpectraMax i3x). The CK activity was calculated  
3 according to the formula provided:

$$4 \text{ CK Activity (units/L)} = ((A_{340\text{nm}})_{(\text{at } 40 \text{ min})} - (A_{340\text{nm}})_{(\text{at } 5 \text{ min})}) / ((A_{340\text{nm}})_{\text{calibrator}} - (A_{340\text{nm}})_{\text{blank}}) * 150$$

### 5 **Quantification of motor neurons in lumbar spinal cord with Nissl Staining**

6 The lumbar portion of the spinal cord was collected from the mice and fixed in 3.7% PFA at  
7 4°C overnight and stored in 70% ethanol until use. After embedding in 6% LMP agarose, the fixed  
8 spinal cords were cut in 25µm sections starting at the upper part to subsequently collect 20 sections  
9 from each lumbar spinal cord using a Vibratome (Leica VT1000S, Germany). The spinal cord  
10 sections were stained with 0.1% Cresyl violet acetate. The motor neurons (Nissl substrate-positive  
11 with diameter larger than 25 µm) in the anterior horn region of each section were quantified in a  
12 double-blind manner for different treatment groups.

### 13 **Confocal imaging and image analysis**

14 Leica TCS SP8 confocal microscope (Leica Microsystems Inc., Germany) was used for  
15 imaging. Images were captured with either 40X, 1.2 NA water immersion objective or 63X, 1.4  
16 NA oil immersion objective. Imaging was conducted at room temperature (~23°C). Background  
17 correction, binary segmentation, polyline kymograph analysis (for fluorescent intensity profiling  
18 over distance) were performed using Fiji (ImageJ). For mouse movement tracking, the video files  
19 were registered using ImageJ (Template Matching Plugin) and tracking analysis was conducted  
20 using “Manual Tracking with TrackMate” plugin. Individual mouse was tracked by creating spots  
21 (with diameter equivalent to mouse belly width) at the center of the torso in each frame. Percentage  
22 of time showing constrained movement was defined as the percentage of the recording time in  
23 which the mouse moved at less than 1 cm/sec speed for 3 seconds or longer.

### 24 **PEGylation of rhMG53**

25 PEGylation is a well-established method for increasing the circulating half-life of therapeutic  
26 proteins(45). We conducted a study with mPEG-SVA (purchased from LaySan Bio, Inc.)  
27 modification of rhMG53. 40mg rhMG53 protein was dissolved in PBS (pH = 8) solution at 1  
28 mg/ml concentration in 4 °C. 40 mg PEG-SVA was added into the rhMG53 solution and mixed  
29 gently. The reaction of PEGylation was carried out at 4 °C overnight. Un-conjugated PEG-SVA

1 was filtered out by Amicon 30 ultrafilter with PBS. PEG-rhMG53 was stored in -20 °C for long-  
2 term storage or 4 °C for short-term usage and to avoid the freeze thaw cycle.

### 3 **Pharmacokinetic evaluation of PEG-rhMG53 in rats**

4 Rats were anesthetized by isoflurane inhalation. rhMG53 or PEG-rhMG53 were injected  
5 intravenously via tail-vein. Blood samples were collected from the tail-vein at 15 min, 30 min, 1  
6 hr, 2 hr, 6 hr, 12 hr, 24 hr, 48 hr (rhMG53 only), and 96 hr (PEG-rhMG53 only) respectively.  
7 Serum was collected by centrifugation of clogged blood at 8000 rpm at 4 °C for 10 min and diluted  
8 at 1:50 for ELISA assay to quantify the serum levels of rhMG53. Specifically, the ELISA plate  
9 (Nunc-Immuno™ plates, 96 well-plate, MaxiSorp) was coated with 100ul/well an anti-MG53  
10 rabbit monoclonal antibody (10 ug/ml) in coating buffer (Na<sub>2</sub>CO<sub>3</sub>: 3.18 g; NaHCO<sub>3</sub> 5.88g to  
11 1000ml, pH=9.6), at 4 °C, overnight. ELISA washing and blocking reagent were purchased from  
12 KPL. Diluted serum samples as well as rhMG53 standards were added into the coated ELISA  
13 plates and incubated for 1.5 hrs. After 4X washing, biotinylated anti-MG53 5259 (1:500,  
14 100ul/well) was added as the detection antibody and incubated for 1.5 hrs. After 4X washing,  
15 HRP-Streptavidin (HRP-Conjugated Streptavidin (Thermo Scientific, Cat No: N100), 1:5000  
16 dilute in blocking buffer) was added and incubated for 30 min at room temperature. After 5X  
17 washing, KPL SureBlue Reserve™ TMB microwell peroxidase substrate (Cat No: 53-00-02) was  
18 added and incubated till blue color develops, then read O.D. at 650 nm. Note that the reason we  
19 used rats instead of mice for the pharmacokinetic evaluation of PEG-rhMG53 is because rat has  
20 much more total blood volume (25 ml) than mice (1.5 ml). Thus, the multiple blood collections  
21 would have minimal effect on rats.

### 22 **Intravenous administration of rhMG53 and PEG-rhMG53**

23 Stock solution of rhMG53 or PEG-rhMG53 was prepared by dissolving rhMG53 or PEG-  
24 rhMG53 in sterilized saline solution at the concentration of 2 mg/ml. The 3/10 cc insulin syringe  
25 with gauge 31 needle was used for the injection. The experimental G93A mouse received  
26 isoflurane inhalation (1-2%) to reach an appropriate anesthesia state, at which time the mouse  
27 showed no response to pinching at their toes. Then, submandibular vein area of the mouse was  
28 cleaned with 70% alcohol wipe, and then rhMG53 or PEG-rhMG53 solution (~30 µl) was injected  
29 into the submandibular vein. The G93A mice in the control group received same amount of saline  
30 injection. The isoflurane inhalation was immediately stopped after the injection. Usually, the



1 mouse resumed normal activities within five minutes after the stop of isoflurane inhalation.  
2 Submandibular vein on both sides was used alternatively for the intravenous administration.

### 3 **Numeric data presentation and statistics**

4 All measurements were taken from distinct samples. Data were presented as mean  $\pm$  S.E. of the  
5 independent determinations except **Figure 5G**, which used median  $\pm$  MAD (median absolute  
6 deviation) due to the relatively large variation of the dataset, and the survival test in **Table S3**.  
7 Statistical comparisons were done using students' t-test (two-sided) for single mean or ANOVA  
8 test for multiple means when appropriate (we assume data to be normally distributed). Pearson's  
9 Chi-squared tests were carried out by RStudio. Pearson's correlation coefficient for colocalization  
10 analysis was calculated by Coloc 2 plugin in ImageJ following the equation below:

$$11 \quad r = [n(\sum xy) - (\sum x)(\sum y)] / \sqrt{[n\sum x^2 - (\sum x)^2][n\sum y^2 - (\sum y)^2]}$$

12 Line plots were generated in either Sigmaplot (Systat Software Inc.) or Excel. Box-and-dot plots  
13 were created by the ggplot2 package of RStudio. The box bottom, median line, and box top  
14 represent the 25th (Q1), 50th (Q2) and 75th percentile (Q3), respectively. Whisker ends represent  
15  $Q1 - 1.5 \cdot IQR$  and  $Q3 + 1.5 \cdot IQR$ , respectively. IQR is interquartile range (Q3-Q1).  $P < 0.05$  was  
16 considered statistically significant.

17

### 18 **Supplementary Materials**

19 Figure S1. Representative images of TA muscle derived from G93A and WT mice (2-month old)  
20 with 30 min running that received EB injection 16 hours early.

21 Figure S2. Additional Western blot data for Figure 1G.

22 Figure S3. Additional representative images for Figure 2A.

23 Figure S4. Additional representative images for Figure 2B.

24 Figure S5. Additional images of anti-MG53 immunostaining of ALS and non-ALS human  
25 muscle samples.

26 Figure S6. Additional anti-MG53 immunostaining and EB retention results of muscle samples  
27 from G93A and WT mice.

28 Table S1. Demographics of human decedents.

29 Table S2. Biospecimen information for human samples.

30 Table S3. The survival days of individual tested G93A mice separated by gender.

- 1 Video S1. Video of PEG-rhMG53 treated and control G93A mice.
- 2
- 3

## 1 References and Notes:

- 2 1. P. I. Joyce, P. Fratta, E. M. Fisher, A. Acevedo-Arozena, SOD1 and TDP-43 animal models of  
3 amyotrophic lateral sclerosis: recent advances in understanding disease toward the development of clinical  
4 treatments. *Mammalian genome : official journal of the International Mammalian Genome Society* **22**, 420-  
5 448 (2011).
- 6 2. A. Alonso, G. Logroscino, S. S. Jick, M. A. Hernan, Incidence and lifetime risk of motor neuron disease in  
7 the United Kingdom: a population-based study. *European journal of neurology : the official journal of the*  
8 *European Federation of Neurological Societies* **16**, 745-751 (2009).
- 9 3. S. Niedermeyer, M. Murn, P. J. Choi, Respiratory Failure in Amyotrophic Lateral Sclerosis. *Chest* **155**,  
10 401-408 (2019).
- 11 4. M. de Carvalho, M. Swash, S. Pinto, Diaphragmatic Neurophysiology and Respiratory Markers in ALS.  
12 *Front Neurol* **10**, 143 (2019).
- 13 5. S. Boillee, C. Vande Velde, D. W. Cleveland, ALS: a disease of motor neurons and their nonneuronal  
14 neighbors. *Neuron* **52**, 39-59 (2006).
- 15 6. M. Dadon-Nachum, E. Melamed, D. Offen, The "dying-back" phenomenon of motor neurons in ALS.  
16 *Journal of molecular neuroscience : MN* **43**, 470-477 (2011).
- 17 7. G. Dobrowolny *et al.*, Skeletal muscle is a primary target of SOD1G93A-mediated toxicity. *Cell Metab* **8**,  
18 425-436 (2008).
- 19 8. L. R. Fischer *et al.*, Amyotrophic lateral sclerosis is a distal axonopathy: evidence in mice and man. *Exp*  
20 *Neurol* **185**, 232-240 (2004).
- 21 9. D. Frey *et al.*, Early and selective loss of neuromuscular synapse subtypes with low sprouting competence  
22 in motoneuron diseases. *J Neurosci* **20**, 2534-2542 (2000).
- 23 10. E. Lepore, I. Casola, G. Dobrowolny, A. Musaro, Neuromuscular Junction as an Entity of Nerve-Muscle  
24 Communication. *Cells* **8**, (2019).
- 25 11. G. Luo *et al.*, Defective mitochondrial dynamics is an early event in skeletal muscle of an amyotrophic  
26 lateral sclerosis mouse model. *PloS one* **8**, e82112 (2013).
- 27 12. A. Musaro, Understanding ALS: new therapeutic approaches. *The FEBS journal* **280**, 4315-4322 (2013).
- 28 13. M. Wong, L. J. Martin, Skeletal muscle-restricted expression of human SOD1 causes motor neuron  
29 degeneration in transgenic mice. *Human molecular genetics* **19**, 2284-2302 (2010).
- 30 14. Y. Xiao *et al.*, ROS-related mitochondrial dysfunction in skeletal muscle of an ALS mouse model during  
31 the disease progression. *Pharmacol Res*, (2018).
- 32 15. L. Dupuis *et al.*, Muscle mitochondrial uncoupling dismantles neuromuscular junction and triggers distal  
33 degeneration of motor neurons. *PloS one* **4**, e5390 (2009).
- 34 16. C. Karam *et al.*, Absence of physiological Ca<sup>2+</sup> transients is an initial trigger for mitochondrial dysfunction  
35 in skeletal muscle following denervation. *Skeletal muscle* **7**, 6 (2017).
- 36 17. J. Magrane, C. Cortez, W. B. Gan, G. Manfredi, Abnormal mitochondrial transport and morphology are  
37 common pathological denominators in SOD1 and TDP43 ALS mouse models. *Human molecular genetics*  
38 **23**, 1413-1424 (2014).
- 39 18. J. Yi *et al.*, Mitochondrial calcium uptake regulates rapid calcium transients in skeletal muscle during  
40 excitation-contraction (E-C) coupling. *J Biol Chem* **286**, 32436-32443 (2011).
- 41 19. J. Zhou *et al.*, Hyperactive intracellular calcium signaling associated with localized mitochondrial defects  
42 in skeletal muscle of an animal model of amyotrophic lateral sclerosis. *J Biol Chem* **285**, 705-712 (2010).
- 43 20. K. Ozato, D. M. Shin, T. H. Chang, H. C. Morse, 3rd, TRIM family proteins and their emerging roles in  
44 innate immunity. *Nature reviews. Immunology* **8**, 849-860 (2008).
- 45 21. C. Cai *et al.*, MG53 nucleates assembly of cell membrane repair machinery. *Nature cell biology* **11**, 56-64  
46 (2009).
- 47 22. C. Cai *et al.*, Membrane repair defects in muscular dystrophy are linked to altered interaction between  
48 MG53, caveolin-3, and dysferlin. *J Biol Chem* **284**, 15894-15902 (2009).
- 49 23. P. Lin *et al.*, Nonmuscle myosin IIA facilitates vesicle trafficking for MG53-mediated cell membrane  
50 repair. *FASEB journal : official publication of the Federation of American Societies for Experimental*  
51 *Biology* **26**, 1875-1883 (2012).
- 52 24. H. Zhu *et al.*, Polymerase transcriptase release factor (PTRF) anchors MG53 protein to cell injury site for  
53 initiation of membrane repair. *J Biol Chem* **286**, 12820-12824 (2011).
- 54 25. C. Cai *et al.*, MG53 regulates membrane budding and exocytosis in muscle cells. *J Biol Chem* **284**, 3314-  
55 3322 (2009).

- 1 26. C. M. Cao *et al.*, MG53 constitutes a primary determinant of cardiac ischemic preconditioning. *Circulation*  
2 **121**, 2565-2574 (2010).
- 3 27. N. Weisleder *et al.*, Recombinant MG53 protein modulates therapeutic cell membrane repair in treatment  
4 of muscular dystrophy. *Science translational medicine* **4**, 139ra185 (2012).
- 5 28. Y. Jia *et al.*, Treatment of acute lung injury by targeting MG53-mediated cell membrane repair. *Nature*  
6 *communications* **5**, 4387 (2014).
- 7 29. J. Liu *et al.*, Cardioprotection of recombinant human MG53 protein in a porcine model of ischemia and  
8 reperfusion injury. *Journal of molecular and cellular cardiology* **80**, 10-19 (2015).
- 9 30. P. Duann *et al.*, MG53-mediated cell membrane repair protects against acute kidney injury. *Science*  
10 *translational medicine* **7**, 279ra236 (2015).
- 11 31. Y. Yao *et al.*, MG53 permeates through blood-brain barrier to protect ischemic brain injury. *Oncotarget*,  
12 (2016).
- 13 32. F. De Giorgio, C. Maduro, E. M. C. Fisher, A. Acevedo-Arozena, Transgenic and physiological mouse  
14 models give insights into different aspects of amyotrophic lateral sclerosis. *Dis Model Mech* **12**, (2019).
- 15 33. P. McGoldrick, P. I. Joyce, E. M. Fisher, L. Greensmith, Rodent models of amyotrophic lateral sclerosis.  
16 *Biochimica et biophysica acta* **1832**, 1421-1436 (2013).
- 17 34. M. E. Gurney *et al.*, Motor neuron degeneration in mice that express a human Cu,Zn superoxide dismutase  
18 mutation. *Science* **264**, 1772-1775 (1994).
- 19 35. P. L. McNeil, K. Miyake, S. S. Vogel, The endomembrane requirement for cell surface repair. *Proceedings*  
20 *of the National Academy of Sciences of the United States of America* **100**, 4592-4597 (2003).
- 21 36. F. L. Muller *et al.*, Denervation-induced skeletal muscle atrophy is associated with increased mitochondrial  
22 ROS production. *American journal of physiology. Regulatory, integrative and comparative physiology* **293**,  
23 R1159-1168 (2007).
- 24 37. M. Hwang, J. K. Ko, N. Weisleder, H. Takeshima, J. Ma, Redox-dependent oligomerization through a  
25 leucine zipper motif is essential for MG53-mediated cell membrane repair. *American journal of physiology.*  
26 *Cell physiology* **301**, C106-114 (2011).
- 27 38. H. Ma *et al.*, Effect of metabolic syndrome on mitsugumin 53 expression and function. *PloS one* **10**,  
28 e0124128 (2015).
- 29 39. H. Wang *et al.*, ALS-associated mutation SOD1(G93A) leads to abnormal mitochondrial dynamics in  
30 osteocytes. *Bone* **106**, 126-138 (2018).
- 31 40. A. C. Ludolph *et al.*, Guidelines for preclinical animal research in ALS/MND: A consensus meeting.  
32 *Amyotroph Lateral Scler* **11**, 38-45 (2010).
- 33 41. H. Wu, L. Mei, Morphological analysis of neuromuscular junctions by immunofluorescent staining of  
34 whole-mount mouse diaphragms. *Methods in molecular biology* **1018**, 277-285 (2013).
- 35 42. J. S. Yi *et al.*, MG53-induced IRS-1 ubiquitination negatively regulates skeletal myogenesis and insulin  
36 signalling. *Nature communications* **4**, 2354 (2013).
- 37 43. N. Weisleder, H. Takeshima, J. Ma, Mitsugumin 53 (MG53) facilitates vesicle trafficking in striated  
38 muscle to contribute to cell membrane repair. *Commun Integr Biol* **2**, 225-226 (2009).
- 39 44. S. Jablonka, B. Holtmann, M. Sendtner, F. Metzger, Therapeutic effects of PEGylated insulin-like growth  
40 factor I in the pmn mouse model of motoneuron disease. *Exp Neurol* **232**, 261-269 (2011).
- 41 45. R. Webster *et al.*, PEGylated proteins: evaluation of their safety in the absence of definitive metabolism  
42 studies. *Drug metabolism and disposition: the biological fate of chemicals* **35**, 9-16 (2007).
- 43 46. A. Basu *et al.*, Structure-function engineering of interferon-beta-1b for improving stability, solubility,  
44 potency, immunogenicity, and pharmacokinetic properties by site-selective mono-PEGylation.  
45 *Bioconjugate chemistry* **17**, 618-630 (2006).
- 46 47. J. M. Harris, R. B. Chess, Effect of pegylation on pharmaceuticals. *Nat Rev Drug Discov* **2**, 214-221  
47 (2003).
- 48 48. J. S. Kang, P. P. Deluca, K. C. Lee, Emerging PEGylated drugs. *Expert Opin Emerg Drugs* **14**, 363-380  
49 (2009).
- 50 49. F. M. Veronese, A. Mero, The impact of PEGylation on biological therapies. *BioDrugs* **22**, 315-329 (2008).
- 51 50. H. Li *et al.*, Modulation of wound healing and scar formation by MG53 protein-mediated cell membrane  
52 repair. *The Journal of biological chemistry* **290**, 24592-24603 (2015).
- 53 51. Z. Bian *et al.*, Sustained elevation of MG53 in the bloodstream increases tissue regenerative capacity  
54 without compromising metabolic function. *Nature communications* **10**, 4659 (2019).
- 55 52. J. M. Shefner, Effects of Strength Training in Amyotrophic Lateral Sclerosis: How Much Do We Know?  
56 *Muscle & nerve* **59**, 6-7 (2019).

- 1 53. S. Tsitkanou, P. Della Gatta, V. Foletta, A. Russell, The Role of Exercise as a Non-pharmacological  
2 Therapeutic Approach for Amyotrophic Lateral Sclerosis: Beneficial or Detrimental? *Front Neurol* **10**, 783  
3 (2019).
- 4 54. P. W. C. Di, P. S. G. C. Di, Safety and efficacy of diaphragm pacing in patients with respiratory  
5 insufficiency due to amyotrophic lateral sclerosis (DiPALS): a multicentre, open-label, randomised  
6 controlled trial. *Lancet Neurol* **14**, 883-892 (2015).
- 7 55. J. Gonzalez-Bermejo *et al.*, Early diaphragm pacing in patients with amyotrophic lateral sclerosis  
8 (RespiStimALS): a randomised controlled triple-blind trial. *Lancet Neurol* **15**, 1217-1227 (2016).
- 9 56. C. J. McDermott *et al.*, DiPALS: Diaphragm Pacing in patients with Amyotrophic Lateral Sclerosis - a  
10 randomised controlled trial. *Health Technol Assess* **20**, 1-186 (2016).
- 11 57. R. G. Miller, R. A. Lewis, Diaphragm pacing in patients with amyotrophic lateral sclerosis. *Lancet Neurol*  
12 **15**, 542 (2016).
- 13 58. H. Wood, Motor neuron disease: Diaphragm pacing is associated with reduced survival in ALS patients  
14 with respiratory insufficiency. *Nature reviews. Neurology* **11**, 484 (2015).
- 15 59. S. Pouvreau *et al.*, Ca(2+) sparks operated by membrane depolarization require isoform 3 ryanodine  
16 receptor channels in skeletal muscle. *Proceedings of the National Academy of Sciences of the United States*  
17 *of America* **104**, 5235-5240 (2007).
- 18 60. H. L. Chandler *et al.*, MG53 promotes corneal wound healing and mitigates fibrotic remodeling in rodents.  
19 *Communications biology* **2**, 71 (2019).
- 20 61. T. M. A. Adesanya *et al.*, MG 53 Protein Protects Aortic Valve Interstitial Cells From Membrane Injury  
21 and Fibrocalcific Remodeling. *J Am Heart Assoc* **8**, e009960 (2019).
- 22  
23

1 **Acknowledgments:**

2 We greatly appreciate Dr. Kathryn Wilsbach, Ms. Kathryn Gallo, Dr. Brent Harris, and Dr. Galam  
3 A Khan from the *Target ALS Human Postmortem Tissue Core* for providing the paraffin-  
4 embedded human muscle sections; Ms. Erin Haggard for language editing of this manuscript.

5 **Funding:**

6 Jingsong Zhou was supported by grants from the Department of Defense  
7 AL170061(W81XWH1810684), NIN grants (R01NS105621 and R01 HL138570), Bank of  
8 America Victor E. Speas Foundation, ALS Association (16-IIP-288) and a pilot grant from Kansas  
9 City Consortium on Musculoskeletal Diseases. Jianjie Ma was supported by NIH grants  
10 (R01AG056919, R01AR061385, R01AR070752 and R01DK106394).

11 **Author contributions:**

12 J.Y., J.Z., and J.M. conceived and designed the project; J.Z., J.M., L.O., A.L., J.Y., and X.L. wrote  
13 the paper; J.Y., A.L., X.L., K.H.P., X.Z., F.Y., Y.X., D.Y., T.T., and J.Z. acquired the data; J.Y.,  
14 A.L., X.L., L.O., J.M. and J.Z. analyzed and interpreted the data.

15 **Competing interests:**

16 J.M. and T.T. have an equity interest in TRIM-edicine, Inc., which develops rhMG53 for the  
17 treatment of human diseases. Patents on the use of MG53 are held by Rutgers University – Robert  
18 Wood Johnson Medical School and The Ohio State University.

19

1

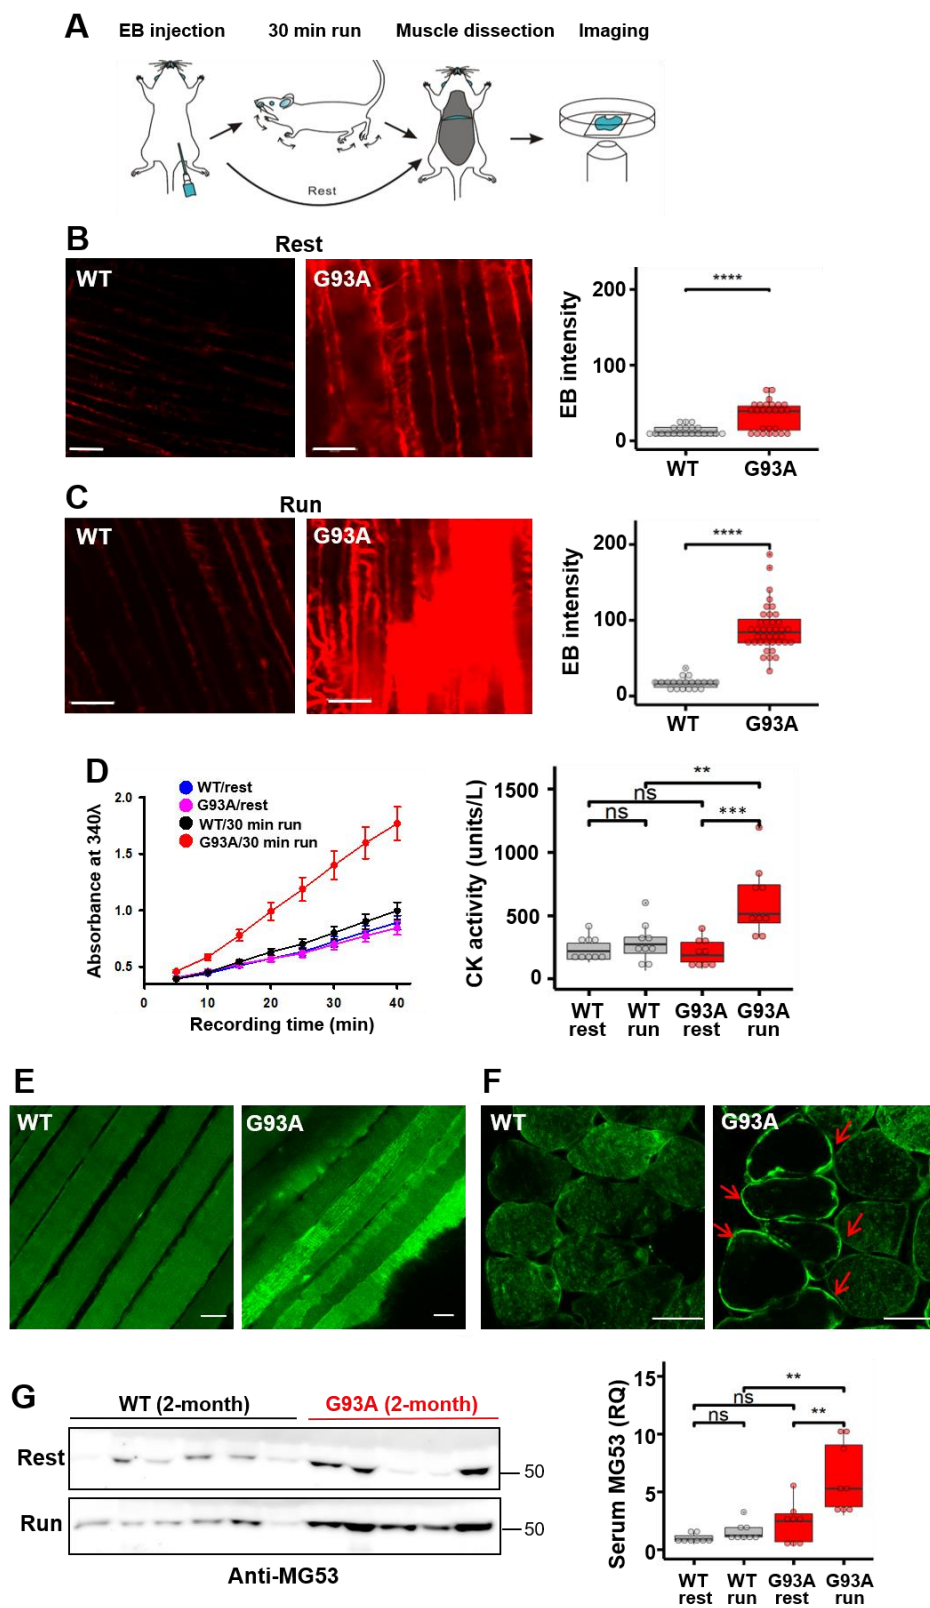

1 **Figure 1. Diaphragm susceptibility to membrane injury is an early pathological event in**  
2 **ALS.**

3 (A) Schematic diagram for evaluation of diaphragm integrity in ALS mice. (B) Compared with  
4 WT mice, diaphragm muscle derived from G93A littermates (2-month old) showed increased EB  
5 intensity without running (WT:  $12.8 \pm 1.5$ , n = 21 from 4 mice; G93A:  $33.4 \pm 3.7$ , n = 26 from 2  
6 mice, \*\*\*\* P < 0.0001). Scale bars: 20  $\mu$ m. (C) 30 min downhill running caused drastic elevation  
7 of EB in diaphragm derived from the G93A mice (WT  $17.30 \pm 1.69$ , n = 20 from 3 mice; G93A:  
8  $88.49 \pm 4.92$ , n = 39 from 4 mice, \*\*\*\* P < 0.0001). Scale bars: 20  $\mu$ m. (D) Quantification of CK  
9 activity in serum samples derived from G93A and WT littermate mice (2- month old) before and  
10 after 30 min running. n = 9 for each group, \*\*P < 0.01, \*\*\*P < 0.001, ns: not significant. *Left*  
11 *panel* shows the time-dependent reading of the absorbance (at 340 nm) of serum samples in a 96-  
12 well plate; *Right panel* shows the calculated CK activity derived from the absorbance reading (see  
13 Method Section). (E) Immunostaining revealed homogenous patterns of MG53 in WT diaphragm,  
14 whereas the G93A diaphragm showed aggregation and patching patterns of MG53 after running,  
15 indicative of membrane injury. Scale bars: 20  $\mu$ m. (F) Cross sectional staining revealed “ring-like”  
16 patterns of MG53 in G93A diaphragm (*arrows*), which were less frequent in WT diaphragm. Scale  
17 bars: 20  $\mu$ m. (G) Immunoblotting of serum MG53 levels in WT and G93A littermate mice (2-  
18 month old) before (rest) and after 30 min running (run). Ponceau S staining indicated equal loading  
19 of the serum samples (see **Figure S2**). WT mice showed no significant changes in the serum MG53  
20 level before and after running (WT/rest:  $1.00 \pm 0.14$  vs WT/run:  $1.58 \pm 0.28$ , ns: P > 0.05). After  
21 running, G93A mice showed significant increase of the serum MG53 level (G93A/rest  $2.29 \pm 0.63$   
22 vs G93A/run:  $6.21 \pm 1.09$ , \*\*P < 0.01). n = 8/group.

23  
24



1 **Figure 2. Disruption of physiological injury-repair process by MG53 at NMJ upon ALS progression.**

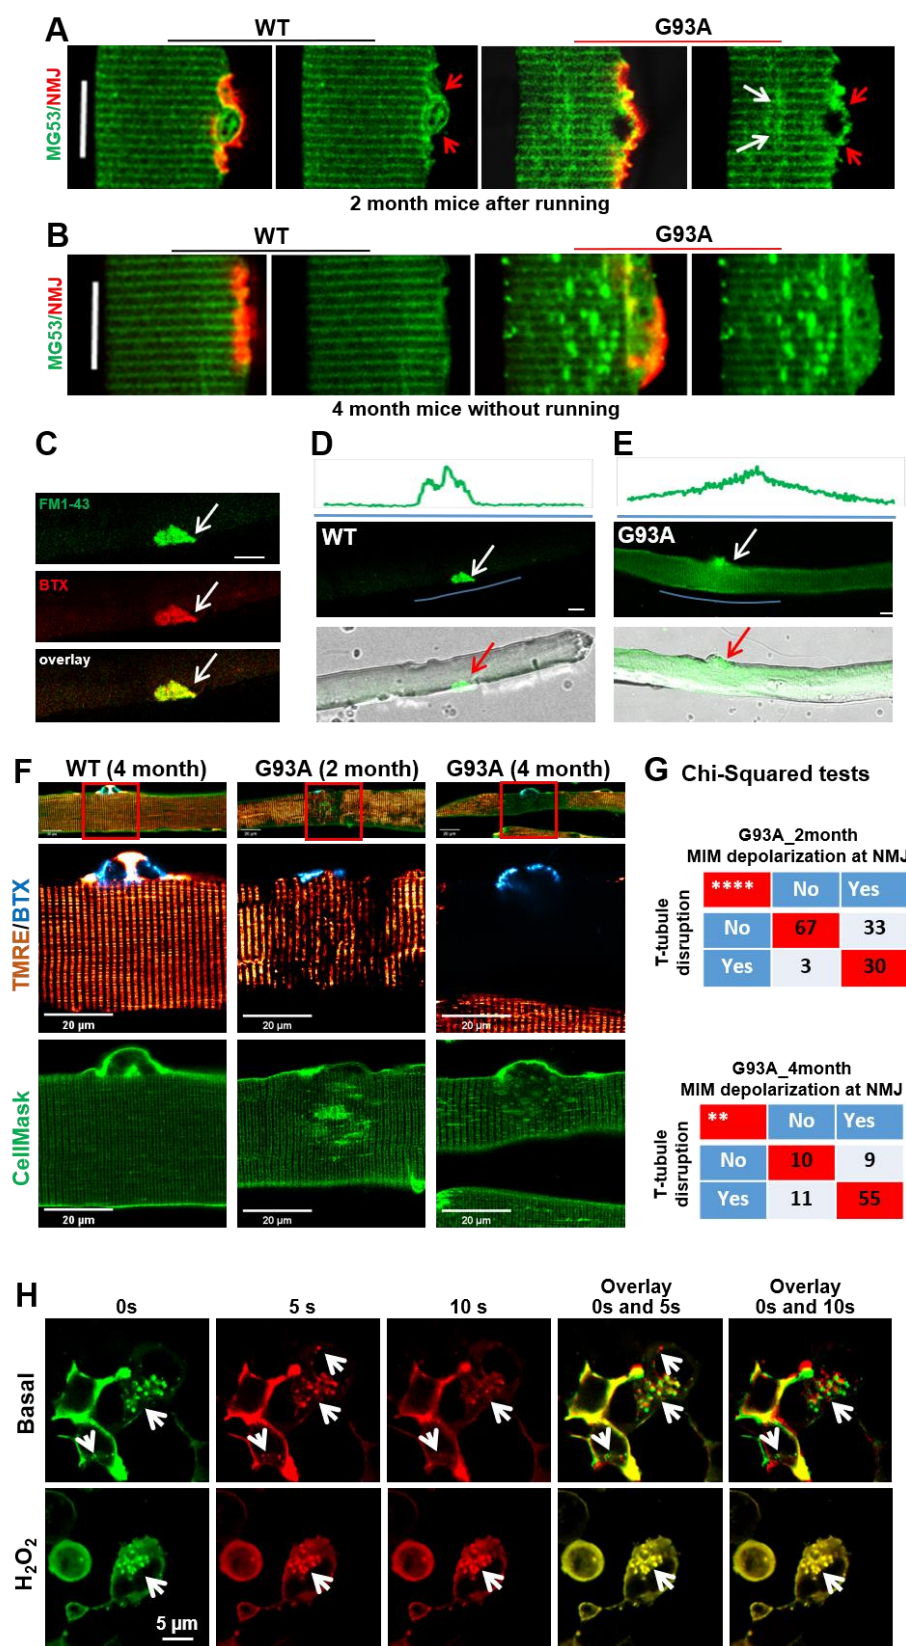

2

1 **Figure 2. Disruption of physiological injury-repair process by MG53 at NMJ upon ALS**  
2 **progression.**

3 (A) FDB myofibers, obtained from WT and G93A mice (2-month old) subjected to 30 min  
4 running, were co-stained with MG53 antibody (green) and BTX (red). MG53 formed patches  
5 covering the NMJ site in both WT and G93A myofibers. However, intracellular MG53 aggregates  
6 start to appear near the site of NMJ in the G93A myofibers. Scale bars: 20  $\mu\text{m}$ . (B) FDB myofiber  
7 derived from G93A mice at the advanced stage of ALS (4-month old) displayed extensive MG53  
8 aggregates near NMJ without running. FDB myofiber derived from WT littermates showed a  
9 uniform pattern of MG53. Scale bars: 20  $\mu\text{m}$ . (C) FM 1-43 and BTX co-localized at the NMJ of  
10 FDB myofibers (white arrows). (D) No intracellular FM 1-43 fluorescence was observed in the  
11 WT myofiber at 20 min after incubation with FM 1-43. (E) FM1-43 entered the G93A myofiber  
12 via the NMJ region. Green line highlights the region for fluorescence intensity profiling. Scale  
13 bars: 20  $\mu\text{m}$ . (F) FDB myofibers were loaded with BTX (cyan), TMRE (red) and CellMask (green)  
14 simultaneously. At the site of NMJ, mitochondria depolarization (loss of TMRE fluorescence)  
15 occurred in myofibers derived from both 2-month and 4-month old G93A mice, accompanied by  
16 disrupted T-tubule network (marked by CellMask). Normal mitochondria and organized T-tubule  
17 network were detected at the site of NMJ of WT myofiber. Scale bar: 20  $\mu\text{m}$ . (G) Chi-Square tests  
18 indicate positive correlations between mitochondrial inner membrane (MIM) depolarization and  
19 T-tubule disorganization at the site of NMJ of G93A mice at both 2 months and 4 months of age  
20 (\*\*P < 0.01, \*\*\*\*P < 0.0001, 3 mice/group). (H) The representative time-lapse images of C2C12  
21 cells with overexpression of GFP-MG53 in the presence and absence (basal) of 1 mM H<sub>2</sub>O<sub>2</sub>. The  
22 overlay images were generated using images at 0s and 5s, or 0s and 10s. White arrows indicate  
23 GFP-MG53 vesicles.

24  
25

1 **Figure 3. Impaired MG53 membrane repair function is a common pathological feature of ALS.**

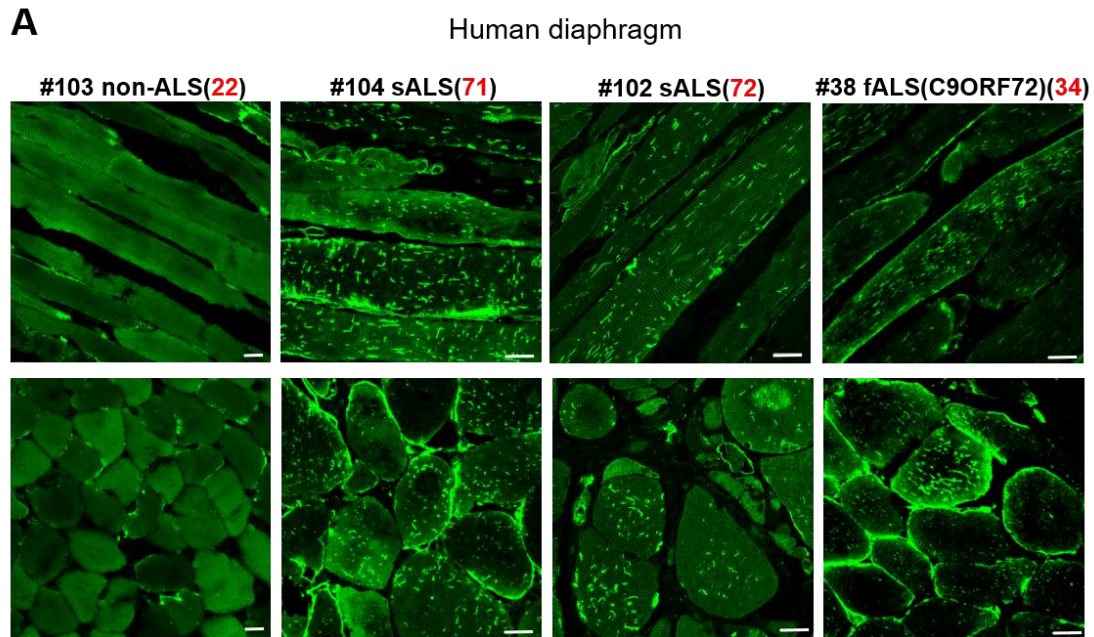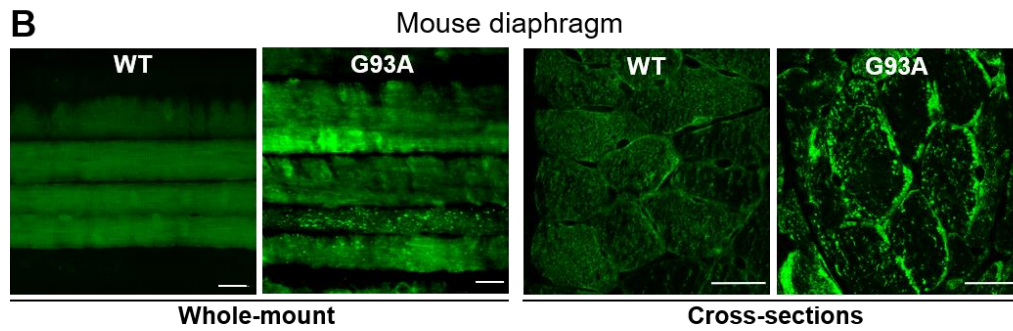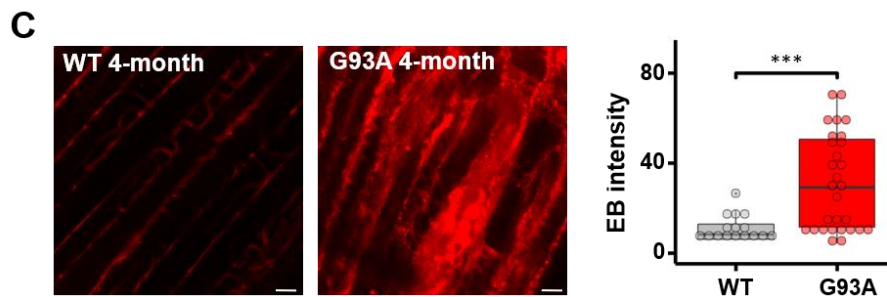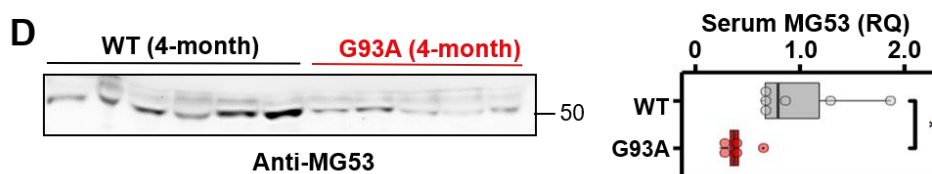

1 **Figure 3. Impaired MG53 membrane repair function is a common pathological feature of**  
2 **ALS**

3 **(A)** Longitudinal (top panels) and cross-sectional (bottom panels) staining of MG53 demonstrated  
4 uniform patterns in non-ALS human diaphragm (left); whereas human ALS diaphragms (sALS:  
5 sporadic ALS: fALS: familial ALS) displayed extensive intracellular aggregates of MG53. The  
6 age at the death was indicated in red fonts. Scale bars: 20  $\mu$ m. **(B)** Diaphragm muscle derived  
7 from a 4-month old G93A mouse (post-ALS onset) also showed intracellular aggregates of MG53.  
8 **(C)** Evaluation of the diaphragm muscle cell membrane integrity using EB dye in 4-month old  
9 G93A and WT mice at rest. The G93A diaphragm showed enhanced EB accumulation (G93A:  
10  $31.1 \pm 4.0$ , n = 29 from 3 mice vs WT:  $10.9 \pm 1.6$ , n = 16 from 2 mice, \*\*\*P < 0.001). Scale bars:  
11 20  $\mu$ m. **(D)** G93A mice at the age of 4 months without running showed significantly lower levels  
12 of the serum MG53 compared with WT littermates (G93A, n = 5; WT, n = 6, \*P < 0.05). Scale  
13 bars: 20  $\mu$ m.

14

1 **Figure 4. rhMG53 preserved membrane integrity of the diaphragm in G93A mice.**

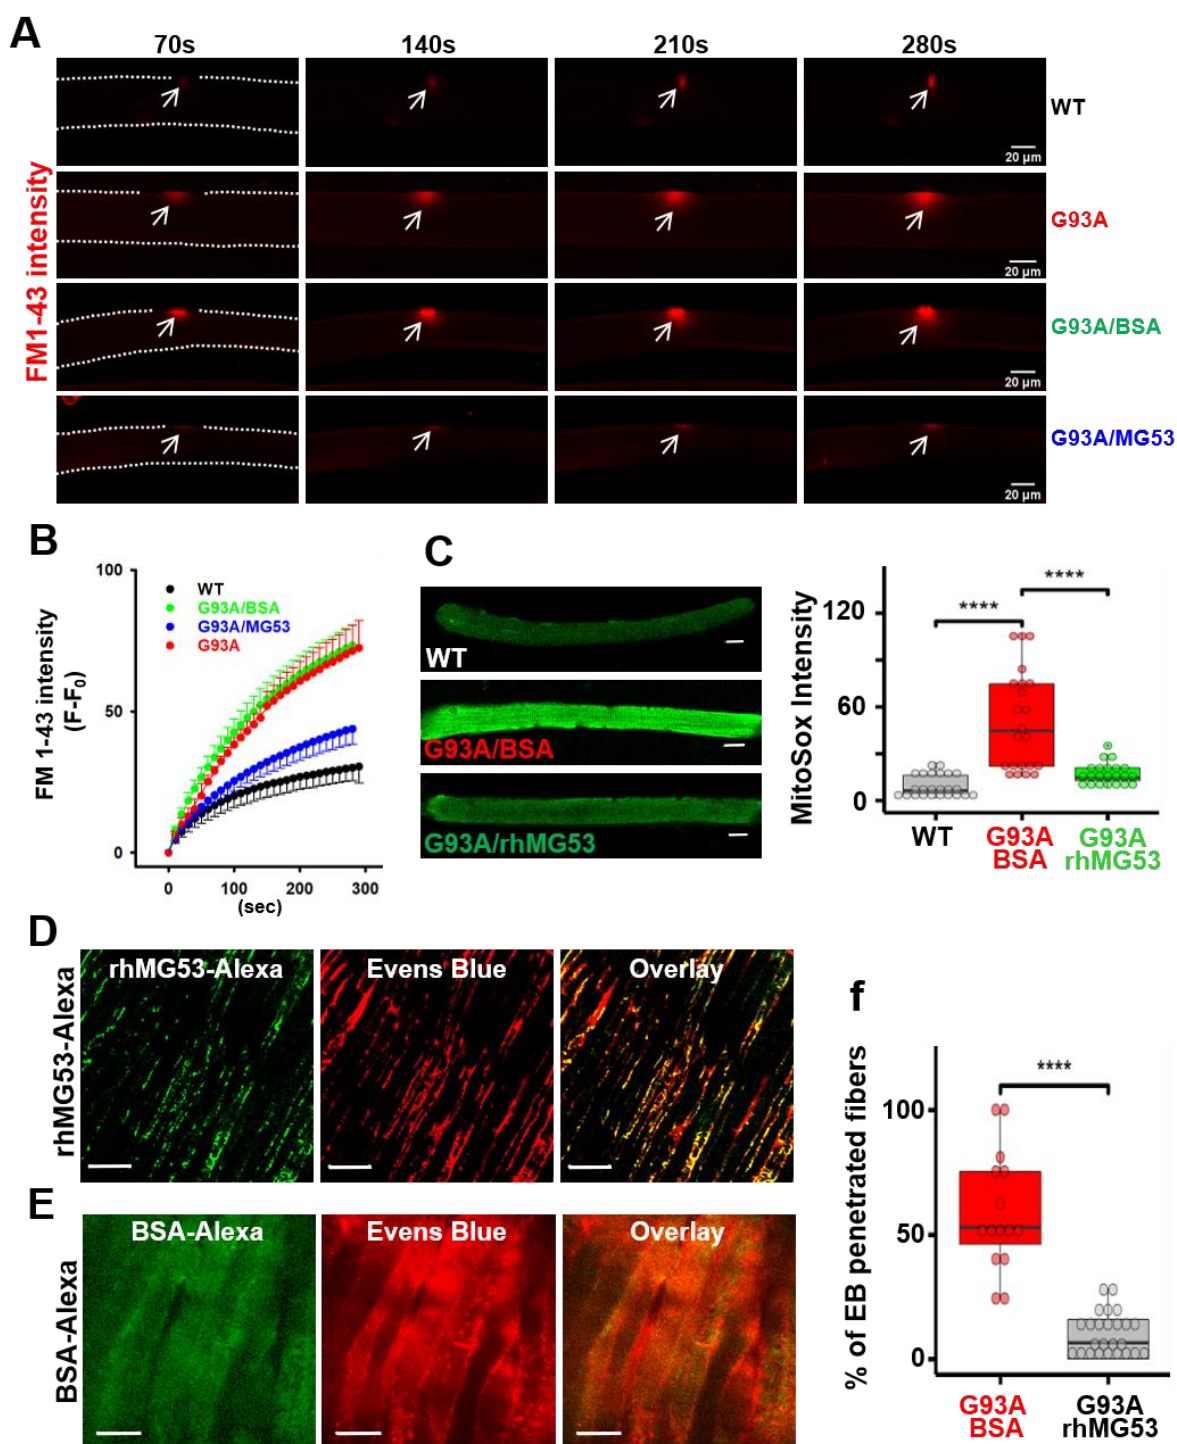

2  
3

1 **Figure 4. rhMG53 preserved membrane integrity of the diaphragm in G93A mice.**

2 (A) Time-lapse recordings of FM 1-43 accumulation in FDB myofibers after laser-induced  
3 membrane damage. The dashed lines highlight the myofiber outline. (B) Plotting of FM 1-43  
4 intensity inside FDB myofibers over time after laser-induced membrane injury. Between G93A  
5 and WT (n = 6-9 myofibers/group; P < 0.001), and between G93A/BSA (9 myofibers) and  
6 G93A/rhMG53 (10 myofibers) (P < 0.001). (C) Live WT and G93A FDB myofibers pre-treated  
7 with rhMG53 (2 µg/ml) or BSA (2 µg/ml, as control) were loaded with MitoSox Red for evaluating  
8 the mitochondrial superoxide production. rhMG53 treatment significantly reduced mitochondrial  
9 superoxide level in G93A FDB myofibers (WT, n = 24; G93A+BSA, n = 22; G93A + rhMG53, n  
10 = 22, \*\*\*\*P < 0.0001). Scale bars: 20 µm. (D) Exercise-induced accumulation of EB in diaphragm  
11 derived from G93A mice (2-month old) was reduced with IV administration of rhMG53-Alexa (2  
12 mg/kg). rhMG53-Alexa targeted to the sarcolemma of the diaphragm. Scale bars: 20 µm. (E)  
13 Diaphragm derived from G93A mice receiving BSA-Alexa showed extensive accumulation of EB.  
14 BSA-Alexa did not target to the sarcolemma. Scale bars: 20 µm. (F) Percentage of myofibers with  
15 EB penetration was significantly reduced with administration of rhMG53-Alexa (n = 14 for BSA-  
16 Alexa488, n = 25 for rhMG53-Alexa488 from 3 pair of G93A mice, \*\*\*\*P < 0.0001).

17

1 **Figure 5. Systemic application of rhMG53 preserved NMJ integrity and promoted motor neuron survival in ALS mice.**  
 2

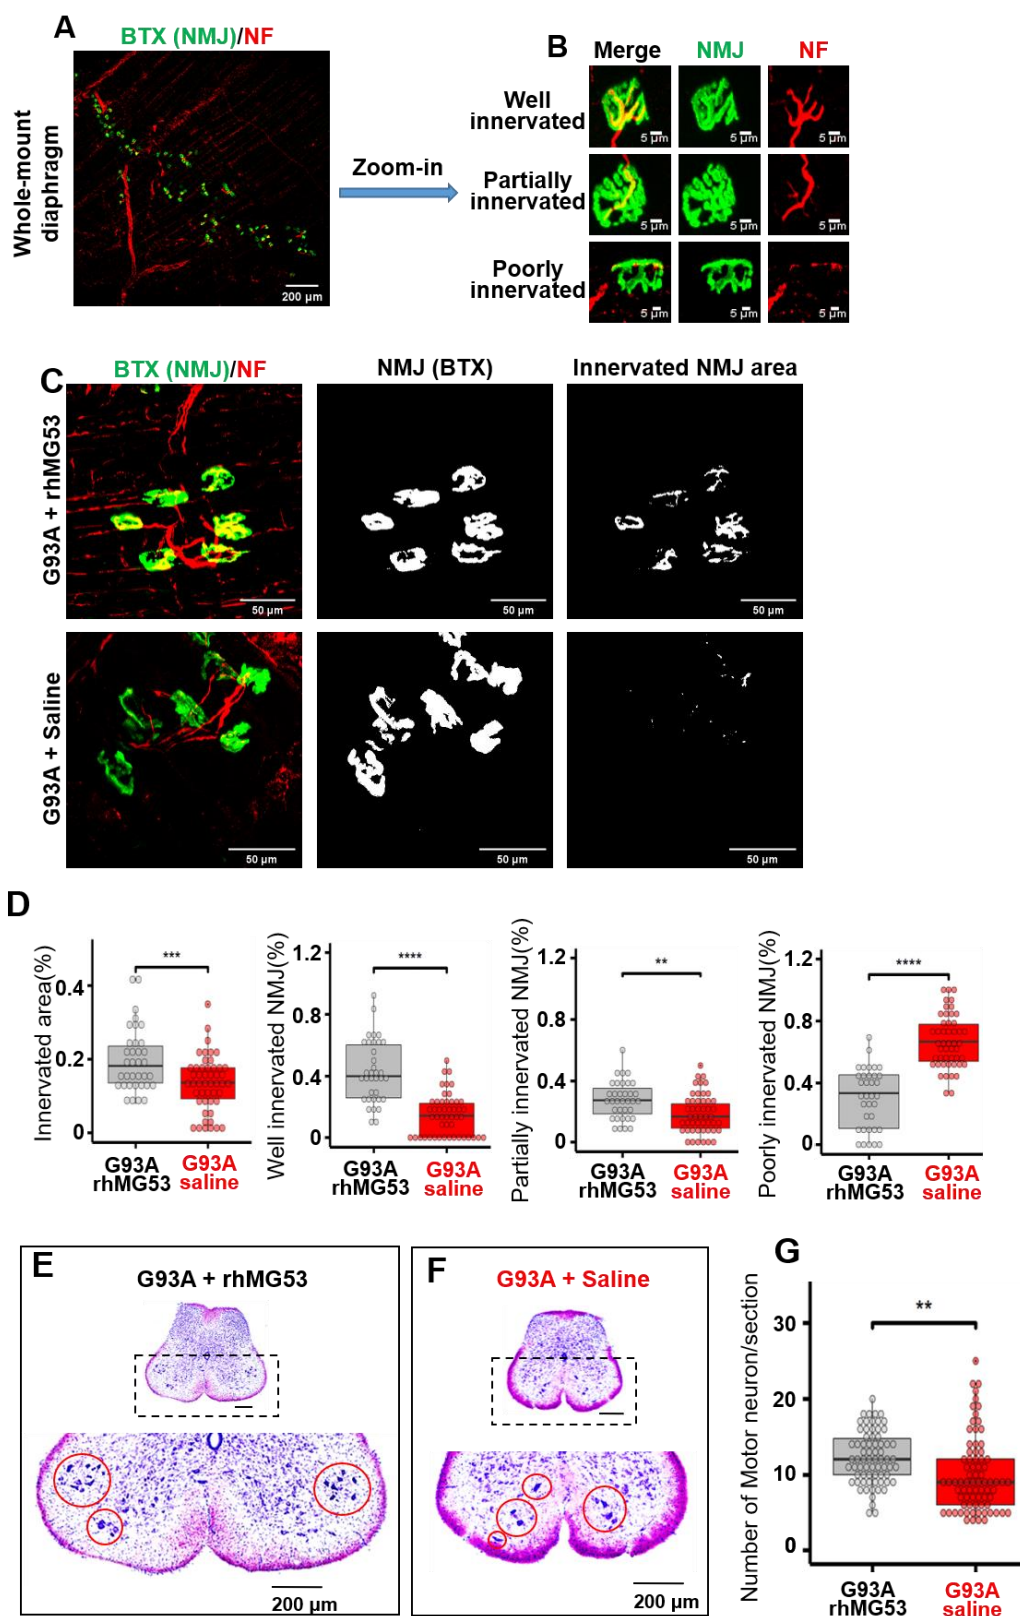

3

1 **Figure 5. Systemic application of rhMG53 preserved NMJ integrity and promoted motor**  
2 **neuron survival in ALS mice.**

3 (A) Whole-mount fixed diaphragm muscle stained with the NF antibody (red) for marking axonal  
4 terminals and BTX (green) for detecting NMJ. (B) Z-stack images of well (the ratio of innervated  
5 area >20%), partially (the ratio of innervated area between 10% and 20%), and poorly innervated  
6 NMJs (the ratio of innervated area < 10%) in diaphragm muscle. (C) Z-stack images of diaphragm  
7 muscle from G93A mice receiving 2-week rhMG53 treatment or saline-control (*left panels*). The  
8 area of individual NMJ defined by BTX was presented (*central panels*). The innervated area of  
9 NMJ was defined by the area overlapping with NF (*right panels*). (D) Comparing the ratio of  
10 innervated NMJ area in rhMG53 (n = 39, 4 mice) and saline (n = 45, 5 mice) treated diaphragm  
11 muscles of G93A littermate mice, as well as the ratio of well, partially, poorly innervated NMJs.  
12 rhMG53 treatment significantly preserved the innervation of NMJ in diaphragm muscle of G93A  
13 littermate mice. \*\*P < 0.01, \*\*\*P < 0.001, \*\*\*\*P < 0.0001. (E, F) Images of the lumbar spinal  
14 cord section of G93A mice (with 2-weeks of rhMG53 or saline treatment from the age of 3  
15 months). (G) The number of surviving motor neurons per section in G93A littermate mice after  
16 two-weeks of treatment with rhMG53 ( $12.2 \pm 0.4$ ) or saline ( $10.1 \pm 0.5$ ) (rhMG53, n = 70 spinal  
17 cord sections; saline, n = 77 spinal cord sections; 4 pairs of G93A mice per cohort, \*\* P < 0.01).

18



1 **Figure 6. rhMG53 alleviates disease progression and extends the life span of G93A mice.**

Fig. 6

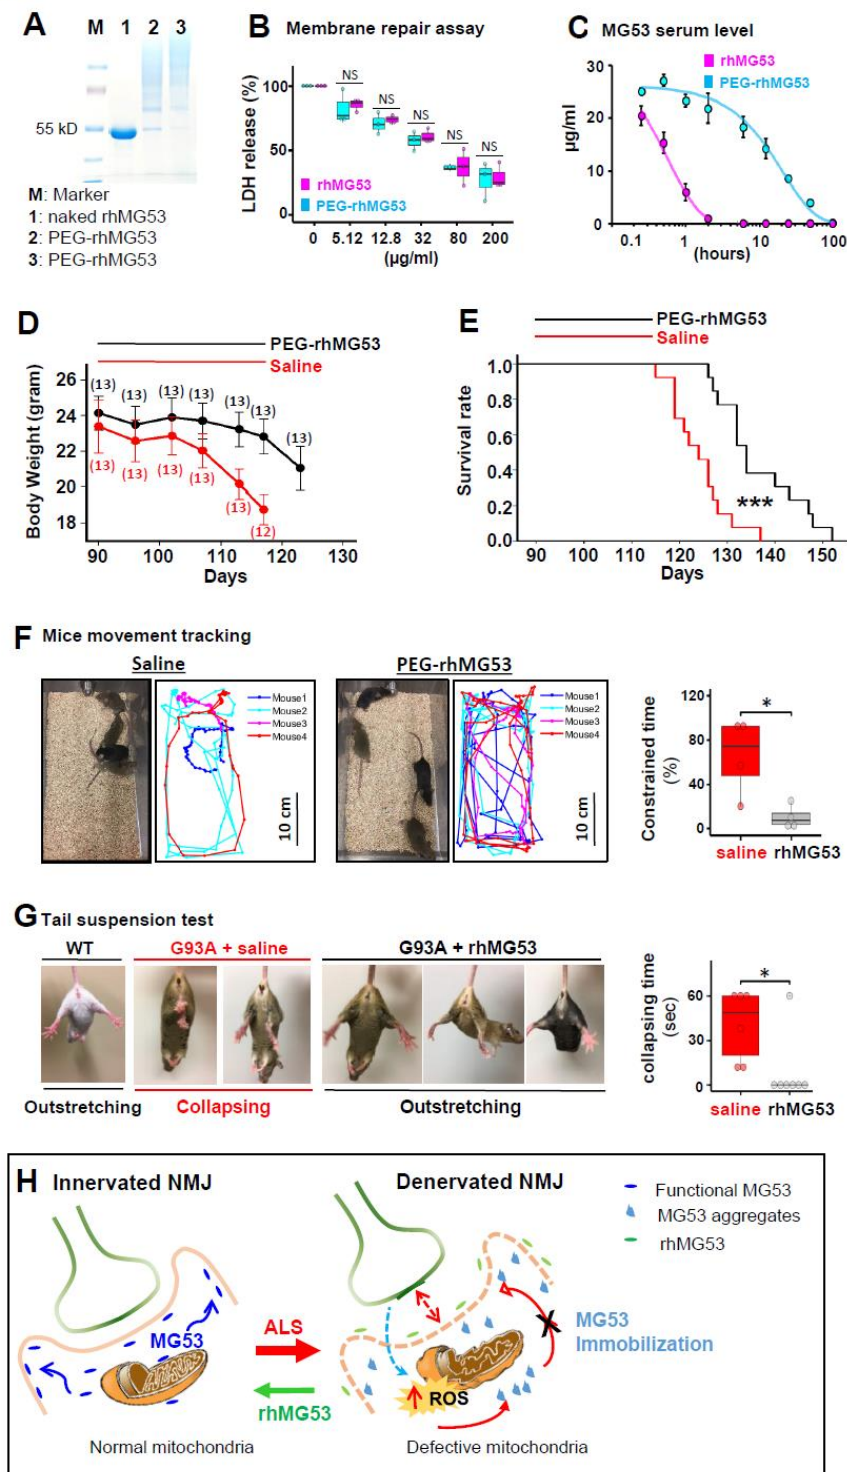

2

1 **Figure 6. rhMG53 alleviates disease progression and extends the life span of G93A mice.**

2 (A) PEGylation of rhMG53 is successful based on the oligomerization pattern of the protein  
3 running on SDS-PAGE. Lanes 2 and 3 represent two independent rhMG53 PEGylation  
4 experiments. (B) The chemical modification did not affect the membrane repair function of rhM53  
5 as there were no difference in EC<sub>50</sub> of LDH release from the cultured C2C12 cells following a  
6 mechanical membrane damage with glass beads between the rhMG53 and PEG-rhMG53 (n = 3  
7 independent experiments). (C) Pharmacokinetic (PK) assessment revealed that PEGylation  
8 increased serum half-life of rhMG53 in rats from 0.5 hour (rhMG53, n = 4) to 12 hours (PEG-  
9 rhMG53, n = 3). (D) Bodyweight changes of G93A mice receiving PEG-rhMG53 or saline  
10 treatment. The numbers of mice included in each data point were indicated on the plot. (E) Survival  
11 curve of G93A mice with one-month PEG-rhMG53 or saline treatment. The endpoint (death) of a  
12 G93A mouse was defined by the loss of righting reflex within 30 sec when the mouse was place  
13 on its side. (n = 13 pairs of G93A littermates, \*\*\*P < 0.001). (F) Mice movement tracking was  
14 performed using 1-minute video recording files of the saline and PEG-rhMG53 treated mice  
15 (Video S1). Percentage of time showing constrained movement is defined as the percentage of the  
16 recording time in which the mouse moved at less than 1 cm/sec speed for 3 sec or longer. (G)  
17 Representative photos and Collapsing time measurement results of tail suspension tests of G93A  
18 mice at the age of 104 day after receiving rhMG53 (n = 7 mice) or saline (n = 6 mice) for 2 weeks.  
19 An age-matched WT mouse was included for comparison (\* P < 0.05). (H) Proposed mechanisms  
20 underlying membrane repair defects at NMJ of ALS.

21
