1 **MG53 slows neuromuscular junction loss**  
2 **and prolongs survival in ALS**

3  
4 Jianxun Yi<sup>1,2</sup>, Ang Li<sup>1,2</sup>, Xuejun Li<sup>1,2</sup>, Ki Ho Park<sup>3</sup>, Xinyu Zhou<sup>3</sup>, Frank Yi<sup>3</sup>, Yajuan Xiao<sup>2</sup>, Dosuk  
5 Yoon<sup>2</sup>, Tao Tan<sup>3</sup>, Lyle W. Ostrow<sup>4</sup>, Jianjie Ma<sup>3\*</sup> and Jingsong Zhou<sup>1,2\*</sup>

6  
7 <sup>1</sup> Department of Kinesiology, College of Nursing and Health Innovation, University of Texas at  
8 Arlington.

9 <sup>2</sup> Department of Physiology, Kansas City University of Medicine and Biosciences.

10 <sup>3</sup> Department of Surgery, Davis Heart and Lung Research Institute, The Ohio State University.

11 <sup>4</sup> Department of Neurology, School of Medicine, Johns Hopkins University.

12  
13 \*Corresponding authors. Emails: [Jingsong.zhou@uta.edu](mailto:Jingsong.zhou@uta.edu) (J.Z.); [Jianjie.ma@osumc.edu](mailto:Jianjie.ma@osumc.edu) (J.M.)

1    **Abstract:** Respiratory failure from progressive respiratory muscle weakness is the most common  
2    cause of death in amyotrophic lateral sclerosis (ALS). Defects in neuromuscular junctions (NMJs)  
3    and progressive NMJ loss occur at early stages, thus stabilizing and preserving NMJs represents a  
4    potential therapeutic strategy to slow ALS disease progression. Here we demonstrate that NMJ  
5    damage is repaired by MG53, an intrinsic muscle protein involved in plasma membrane repair.  
6    Compromised diaphragm muscle membrane repair and NMJ integrity are early pathological  
7    findings in ALS. Diaphragm muscles from ALS mouse models show increased susceptibility to  
8    injury and intracellular MG53 aggregation, which is also a hallmark of human muscle samples  
9    from ALS patients. We show that systemic administration of recombinant human MG53 protein  
10    (rhMG53) in ALS mice protects against injury to diaphragm muscle, preserves NMJ integrity, and  
11    slows ALS disease progression. As MG53 is present in circulation in rodents and humans under  
12    physiological conditions, our findings provide proof-of-concept data supporting MG53 as a  
13    potentially safe and effective therapy to mitigate ALS progression.

14

15    **Keywords:** Amyotrophic lateral sclerosis, Sarcolemma damage, Neuromuscular junction,  
16    Diaphragm

17

18

19

20

21

22

23

24

25

26

27

## 1 **Introduction**

2 Amyotrophic lateral sclerosis (ALS) is a fatal neuromuscular disease characterized by  
3 progressive motor neuron loss and muscle atrophy[1, 2]. Progressive respiratory muscle weakness  
4 is a main cause of morbidity and eventual death[3, 4]. ALS appears to be a combination of “dying-  
5 forward” and/or “dying-back” pathophysiological processes, starting in cortical motor neurons and  
6 glia, or at the muscle and NMJ[5-16]. It is possible that the balance of these processes differs in  
7 subsets of ALS patients, and several mechanisms have been proposed for how they may interrelate.  
8 For example, NMJ degeneration is associated with mitochondrial dysfunction in ALS[17-21],  
9 which involves bidirectional crosstalk between myofibers and neuron[6, 8, 9, 17-21]. Therapeutic  
10 approaches that sustain NMJ integrity and muscle function could slow disease progression. Thus,  
11 it is critical to understand the molecular mechanisms associated with NMJ degeneration in ALS.

12 During respiration, the diaphragm constantly undergoes contraction-relaxation, a process that  
13 leads to injury to the muscle membrane. Inadequate repair of injury to the sarcolemma can disrupt  
14 NMJ integrity and contribute to diaphragm wasting in ALS. MG53, a member of the tripartite  
15 motif (TRIM) protein family[22], was identified as an essential component of the cell membrane  
16 repair machinery[23-26]. Genetic ablation of MG53 results in defective membrane repair and  
17 tissue regenerative capacity[23, 24, 27, 28]. A series of studies have shown that recombinant  
18 human MG53 (rhMG53) protein protects various cell types against membrane disruption when  
19 applied to the extracellular environment, and ameliorates pathology associated with muscular  
20 dystrophy[29], acute lung injury[30], myocardial infarction[31], acute kidney injury[32], and  
21 ischemic brain damage[33] in animal models.

22 In this study, we identify NMJ as an active site of injury-repair by MG53 and show that  
23 compromised diaphragm muscle membrane repair occurs prior to symptom onset in ALS mice.  
24 Oxidative stress associated with mitochondrial dysfunction in ALS muscle leads to formation of  
25 MG53 protein aggregates and disruption of MG53-mediated membrane repair. Diaphragm  
26 muscles from ALS mouse models show increased susceptibility to injury and intracellular MG53  
27 aggregation, which is also seen in human muscle samples from ALS patients. Remarkably,  
28 systemic application of rhMG53 in ALS mice protects against injury to the diaphragm, preserves  
29 integrity of NMJ, and significantly alleviates ALS disease progression.

30

## 1 **Materials and Methods**

### 2 **Animal models**

3 The ALS transgenic mouse model (G93A) with genetic background of B6SJL was originally  
4 generated by Drs. Deng and Siddique's group at Northwestern University[34], which was also  
5 deposited to the Jackson Lab as B6SJL-Tg (SOD1\*G93A). We obtained this colony from Dr. Deng  
6 and maintained it through breeding the B6SJL/G93A male mice with B6SJL/WT female mice. All  
7 experiments were carried out in accordance with the recommendations in the Guide for the Care  
8 and Use of Laboratory Animals of the National Institutes of Health. Protocols on the usage of mice  
9 were approved by the Institutional Animal Care and Use Committee of University of Missouri at  
10 Kansas City, Kansas City University of Medicine and Biosciences and University of Texas at  
11 Arlington. Sprague-Dawley rats (4-month old) were purchased from Charles River Laboratories.  
12 Protocol on the usage of rats was approved by the Institutional Animal Care and Use Committee  
13 of the Ohio State University.

### 14 **Isolation of single live FDB muscle fibers (myofibers)**

15 Experimental mice were euthanized by cervical dislocation, and FDB muscles were removed  
16 for enzyme digestion to obtain individual myofibers for functional or biochemical studies [18, 20,  
17 21]. Briefly, FDB muscles were digested in modified Krebs solution (0 Ca<sup>2+</sup>) containing 0.2% type  
18 I Collagenase (Sigma), for 1 hour at 37 °C. After digestion, muscles were kept in collagenase-free  
19 Krebs solution (with 2.5 mM Ca<sup>2+</sup> and 10 mM glucose) at 4°C and used for studies within 24 hours.

### 20 **Evaluation of T-tubule network integrity and mitochondrial membrane potential at NMJ**

21 Freshly isolated FDB myofibers were seeded in laminin (Santa Cruz sc-29012) coated glass  
22 bottom dishes and stained with TMRE (1: 3000 dilution from 150 µM stock solution, Invitrogen  
23 T669), BTX-Alexa Fluor 488 (1: 1000 dilution from 1 mg/ml stock solution, Invitrogen B13422)  
24 and CellMask DeepRed (1:1000 dilution from 5 mg/ml stock solution, Invitrogen C10046) for 30  
25 min. The myofibers were washed 5 times with 2.5 mM Ca<sup>2+</sup> Krebs solution before imaging with  
26 confocal microscopy. BTX-Alexa Fluor 488 was excited by 488 nm laser (emission filter 500-550  
27 nm). TMRE was excited by 568 nm laser (emission filter 575-625 nm). CellMask DeepRed was  
28 excited by 633 nm laser (emission filter 640-700 nm).

### 29 **Evaluation of mitochondrial ROS level in live FDB myofibers**

1 The fluorescent dye MitoSOX<sup>TM</sup> Red (M36008, Invitrogen) was used to evaluate mitochondrial  
2 superoxide level in live FDB myofibers. FDB myofibers were incubated with 1  $\mu$ M MitoSOX<sup>TM</sup>  
3 Red in Krebs solution for 10 min at 37°C. The fluorescence intensity of MitoSOX<sup>TM</sup> Red was  
4 recorded on Leica TCS SP8 confocal microscope (Leica Microsystems Inc., Germany).  
5 MitoSOX<sup>TM</sup> Red was excited by 514 nm laser (emission filter 570-600 nm). All parameters for  
6 imaging collection were kept the same between control and experimental groups, which includes  
7 the power of the laser used, the pinhole, and the gain of the fluorescence recording.

### 8 **Evaluation of membrane repair function in live FDB myofibers**

9 We adapted a laser-induced membrane damage protocol from our early publications[23, 29] to  
10 evaluate the membrane repair function of live myofibers. 2  $\mu$ M of FM 1-43 fluorescent dye were  
11 added to the medium of freshly isolated FDB myofibers[23, 26] with 50  $\mu$ M n-benzyl-p-toluene  
12 sulfonamide to prevent myofiber contraction[20, 35]. Using the FRAP protocol on the Leica TCS  
13 SP8 confocal microscope, a small area of the myofiber (12  $\mu$ m X 12  $\mu$ m) was exposed to a high  
14 intensity laser (488 nm, 50% power) to cause a localized muscle membrane injury. The time-  
15 dependent accumulation of FM 1-43 fluorescent signal inside the myofiber after the laser-induced  
16 membrane injury was recorded every 10 s for 5 min. FM 1-43 was excited by 488 nm laser  
17 (emission filter 550-610 nm). All parameters for imaging collection were kept the same for all  
18 tested myofibers, which includes the power of the laser used, the pinhole, and the gain of the  
19 fluorescence detector. The individual data point of the fluorescent intensity was calculated as (F-  
20 F<sub>0</sub>), in which the background fluorescence (F<sub>0</sub>) was corrected for each data point.

### 21 **Quantification of membrane integrity of diaphragm muscle**

22 EB dye (1% in PBS, 10 $\mu$ l/g body weight) was applied to mice via IP injection[29]. 16 hours  
23 later, the live diaphragm muscle was removed from the mice and immediately immersed in Krebs  
24 solution for evaluation of the EB fluorescence intensity retained inside myofibers under a confocal  
25 microscope. EB was excited by 633 nm laser (emission filter 640-700 nm). All parameters for  
26 imaging collection were kept the same between control and experimental groups, which includes  
27 the power of the laser used, the pinhole, and the gain of the fluorescence recording.

### 28 **Immunohistochemistry of mouse and human muscle**

29 For whole-mount fixed muscle assay, the intact diaphragm, TA, EDL, and soleus muscles were  
30 dissected from the experimental mice and fixed in either methanol (precooled at -20 °C) for 10

1 min or 4% paraformaldehyde (PFA) overnight at 4 °C. For PFA fixed samples, the reaction was  
2 stopped by PBS containing 1% glycine. The samples were then washed with PBS, dehydrated and  
3 rehydrated through a graded series of alcohol. Pre-blocking was done at room temperature for 2  
4 hours in blocking buffer containing 3% goat serum, 3% BSA, 0.1% Tween-20, 0.1% Triton X100,  
5 and 0.1% NaN<sub>3</sub>. The whole-mount fixed muscle samples were then incubated with primary  
6 antibody at 4 °C overnight (anti-neurofilament: Abcam, ab8135 1:250 dilution; anti-Mg53  
7 antibody: 1:200 dilution [32, 36-38]). After PBS washing, the samples were incubated for 4 hours  
8 with Alexa Fluor conjugated secondary antibodies of the corresponding species/Isotype (1:1000).  
9 The samples were then washed again, cleared in glycerol and mounted in anti-fade mounting media  
10 (Tris buffer containing 60% glycerol and 0.5% N- propyl gallate) for imaging under confocal  
11 microscope. For the NMJ staining, BTX-Alexa Fluor 488 (1:1000 dilution) was added during the  
12 2<sup>nd</sup> antibodies' incubation.

13 Formalin-fixed, paraffin-embedded slides of post-mortem ALS and non-neurological control  
14 decedent muscle were obtained from the *Target ALS Multicenter Postmortem Tissue Core*. All  
15 decedents underwent standard autopsies with consents for autopsy obtained by next-of-kin after  
16 death, and HIPAA Form 5 exemptions to access and share de-identified clinical data from  
17 decedents. Slides were provided blinded to whether they were from ALS or control autopsies, and  
18 then unblinded after staining and analysis was completed.

19 For paraffin sectioning, muscle samples were fixed in 4% paraformaldehyde (PFA) overnight  
20 at 4 °C, washed with PBS, and dehydrated through a graded series of alcohol. Clearance was done  
21 with xylene and paraffin embedding was carried out under negative pressure for 3 hours. Samples  
22 were cut into 8µm sections for immunostaining. Antigen retrieval was carried out at 95 °C for 20  
23 min in citrate buffer (pH 6.0).

24 For dissociated FDB myofibers, the samples were allowed to attach to laminin (sc-29012)  
25 coated glass bottom dishes for 30 minutes in culture media containing Alexa Fluor coupled BTX  
26 (1:1000) before fixation (4% PFA for 15 minutes at 37 °C). The pre-blocking, primary, and  
27 secondary antibody incubation steps were the same as described above.

## 28 **Immunoblotting assay**

29 The mouse serum samples (1.5 µl each) were resolved in 8.7% SDS polyacrylamide gels and  
30 transferred to a polyvinylidene difluoride (PVDF) membrane and probed with an anti-MG53  
31 antibody 1:2000. Ponceau S staining was used to verify equal loading of the serum samples.

1 Proteins from mouse TA muscle were extracted with RIPA/protease inhibitors and resolved by  
2 10% SDS-PAGE, then transferred to PVDF membrane and probed with antibodies against MG53  
3 antibody 1:5000, and GAPDH (1:10,000, from CST). Protein bands were visualized with ECL  
4 reagents under ChemiDoc Imaging system (Bio-Rad Laboratory). Band intensity was analyzed  
5 with ImageJ software (NIH, Bethesda, MD).

### 6 **Evaluation of serum creatine kinase (CK) activity**

7 Blood samples (~100µl/mouse) were collected from the tail vein of mice at rest. Then the same  
8 group of mice were subjected to a 30 min running protocol at 18 m/min, 15° downhill. Right after  
9 completion of the running protocol, the blood samples were collected again. The serum was  
10 collected from supernatant after centrifuging the blood samples at 2000g for 10 min at 4°C. Freshly  
11 made serum samples were used to measure CK activity following the protocol provided by Sigma  
12 (MAK-116). Briefly, for each reaction, 10 µl of serum was mixed with 100ul assay buffer, the  
13 mixture was then loaded onto a 96 well plate for recording the absorbance at 340nm at time  
14 intervals of 5 min up to 40 min in a plate reader (SpectraMax i3x). The CK activity was calculated  
15 according to the formula provided:

$$16 \text{ CK Activity (units/L)} = ((A_{340\text{nm}})_{\text{(at 40 min)}} - (A_{340\text{nm}})_{\text{(at 5 min)}}) / ((A_{340\text{nm}})_{\text{calibrator}} - (A_{340\text{nm}})_{\text{blank}}) * 150$$

### 17 **Quantification of motor neurons in lumbar spinal cord with Nissl Staining**

18 The lumbar portion of the spinal cord was collected from the mice and fixed in 3.7% PFA at  
19 4°C overnight and stored in 70% ethanol until use. After embedding in 6% LMP agarose, the fixed  
20 spinal cords were cut in 25µm sections starting at the upper part to subsequently collect 20 sections  
21 from each lumbar spinal cord using a Vibratome (Leica VT1000S, Germany). The spinal cord  
22 sections were stained with 0.1% Cresyl violet acetate. The motor neurons (Nissl substrate-positive  
23 with diameter larger than 25 µm) in the anterior horn region of each section were quantified in a  
24 double-blind manner for different treatment groups.

### 25 **Confocal imaging and image analysis**

26 Leica TCS SP8 confocal microscope (Leica Microsystems Inc., Germany) was used for  
27 imaging. Images were captured with either 40X, 1.2 NA water immersion objective or 63X, 1.4  
28 NA oil immersion objective. Imaging was conducted at room temperature (~23°C). Background  
29 correction, binary segmentation, polyline kymograph analysis (for fluorescent intensity profiling  
30 over distance) were performed using Fiji (ImageJ). For mouse movement tracking, the video files



1 were registered using ImageJ (Template Matching Plugin) and tracking analysis was conducted  
2 using “Manual Tracking with TrackMate” plugin. Individual mouse was tracked by creating spots  
3 (with diameter equivalent to mouse belly width) at the center of the torso in each frame. Percentage  
4 of time showing constrained movement was defined as the percentage of the recording time in  
5 which the mouse moved at less than 1 cm/sec speed for 3 seconds or longer.

### 6 **PEGylation of rhMG53**

7 PEGylation is a well-established method for increasing the circulating half-life of therapeutic  
8 proteins[39]. We conducted a study with mPEG-SVA (purchased from LaySan Bio, Inc.)  
9 modification of rhMG53. 40mg rhMG53 protein was dissolved in PBS (pH = 8) solution at 1  
10 mg/ml concentration in 4 °C. 40 mg PEG-SVA was added into the rhMG53 solution and mixed  
11 gently. The reaction of PEGylation was carried out at 4 °C overnight. Un-conjugated PEG-SVA  
12 was filtered out by Amicon 30 ultrafilter with PBS. PEG-rhMG53 was stored in -20 °C for long-  
13 term storage or 4 °C for short-term usage and to avoid the freeze thaw cycle.

### 14 **Pharmacokinetic evaluation of PEG-rhMG53 in rats**

15 Rats were anesthetized by isoflurane inhalation. rhMG53 or PEG-rhMG53 were injected  
16 intravenously via tail-vein. Blood samples were collected from the tail-vein at 15 min, 30 min, 1  
17 hr, 2 hr, 6 hr, 12 hr, 24 hr, 48 hr (rhMG53 only), and 96 hr (PEG-rhMG53 only) respectively.  
18 Serum was collected by centrifugation of clogged blood at 8000 rpm at 4 °C for 10 min and diluted  
19 at 1:50 for ELISA assay to quantify the serum levels of rhMG53. Specifically, the ELISA plate  
20 (Nunc-Immuno™ plates, 96 well-plate, MaxiSorp) was coated with 100ul/well an anti-MG53  
21 rabbit monoclonal antibody (10 ug/ml) in coating buffer (Na<sub>2</sub>CO<sub>3</sub>: 3.18 g; NaHCO<sub>3</sub> 5.88g to  
22 1000ml, pH=9.6), at 4 °C, overnight. ELISA washing and blocking reagent were purchased from  
23 KPL. Diluted serum samples as well as rhMG53 standards were added into the coated ELISA  
24 plates and incubated for 1.5 hrs. After 4X washing, biotinylated anti-MG53 5259 (1:500,  
25 100ul/well) was added as the detection antibody and incubated for 1.5 hrs. After 4X washing,  
26 HRP-Streptavidin (HRP-Conjugated Streptavidin (Thermo Scientific, Cat No: N100), 1:5000  
27 dilute in blocking buffer) was added and incubated for 30 min at room temperature. After 5X  
28 washing, KPL SureBlue Reserve™ TMB microwell peroxidase substrate (Cat No: 53-00-02) was  
29 added and incubated till blue color develops, then read O.D. at 650 nm. Note that the reason we  
30 used rats instead of mice for the pharmacokinetic evaluation of PEG-rhMG53 is because rat has



1 much more total blood volume (25 ml) than mice (1.5 ml). Thus, the multiple blood collections  
2 would have minimal effect on rats.

### 3 **Intravenous administration of rhMG53 and PEG-rhMG53**

4 Stock solution of rhMG53 or PEG-rhMG53 was prepared by dissolving rhMG53 or PEG-  
5 rhMG53 in sterilized saline solution at the concentration of 2 mg/ml. The 3/10 cc insulin syringe  
6 with gauge 31 needle was used for the injection. The experimental G93A mouse received  
7 isoflurane inhalation (1-2%) to reach an appropriate anesthesia state, at which time the mouse  
8 showed no response to pinching at their toes. Then, submandibular vein area of the mouse was  
9 cleaned with 70% alcohol wipe, and then rhMG53 or PEG-rhMG53 solution (~30 µl) was injected  
10 into the submandibular vein. The G93A mice in the control group received same amount of saline  
11 injection. The isoflurane inhalation was immediately stopped after the injection. Usually, the  
12 mouse resumed normal activities within five minutes after the stop of isoflurane inhalation.  
13 Submandibular vein on both sides was used alternatively for the intravenous administration.

### 14 **Numeric data presentation and statistics**

15 All measurements were taken from distinct samples. Data were presented as mean ± S.E. of the  
16 independent determinations except **Fig. 5g**, which used median ± MAD (median absolute  
17 deviation) due to the relatively large variation of the dataset, and the survival test in  
18 **Supplementary Table 3**. Statistical comparisons were done using students' t-test (two-sided) for  
19 single mean or ANOVA test for multiple means when appropriate (we assume data to be normally  
20 distributed). Pearson's Chi-squared tests were carried out by RStudio. Pearson's correlation  
21 coefficient for colocalization analysis was calculated by Coloc 2 plugin in ImageJ following the  
22 equation below:

$$23 \quad r = [n(\sum xy) - (\sum x)(\sum y)] / \sqrt{[n \sum x^2 - (\sum x)^2][n \sum y^2 - (\sum y)^2]}$$

24 Line plots were generated in either Sigmaplot (Systat Software Inc.) or Excel. Box-and-dot plots  
25 were created by the ggplot2 package of RStudio. The box bottom, median line, and box top  
26 represent the 25th (Q1), 50th (Q2) and 75th percentile (Q3), respectively. Whisker ends represent  
27  $Q1 - 1.5 \cdot IQR$  and  $Q3 + 1.5 \cdot IQR$ , respectively. IQR is interquartile range (Q3-Q1).  $P < 0.05$  was  
28 considered statistically significant.

29

## 1 **Results**

### 2 *Increased susceptibility to diaphragm membrane injury is an early finding in SOD1(G93A) mice*

3 Transgenic mice expressing the human SOD1<sup>G93A</sup> mutation (G93A) are a highly characterized  
4 and widely used model for preclinical investigation of pathogenic mechanisms in ALS[40, 41].  
5 As illustrated in **Fig. 1a**, we performed intraperitoneal (IP) injections of Evans blue (EB) dye to  
6 wild type (WT) and G93A littermates at 2 months of age (pre-symptomatic stage, prior to ALS  
7 onset)[34]. We harvested the diaphragm muscles 16 hours later, immediately after the mice  
8 performed a 30 min running protocol (18 m/min, 15° downhill), and evaluated EB retention within  
9 muscle myofibers. The amount of EB fluorescence measures the extent of muscle membrane  
10 leakage. The G93A diaphragm muscles displayed significantly higher EB levels under resting  
11 condition compared to WT (**Fig. 1b**). The 30 min downhill protocol further dramatically enhanced  
12 EB accumulation in the G93A diaphragm (**Fig. 1c**), but there was no change in the WT mice. The  
13 same exercise-induced excessive membrane damage was also observed in the tibialis anterior (TA)  
14 muscle derived from the G93A mice (**Supplementary Fig. 1**). Measurement of serum creatine  
15 kinase (CK) showed significant elevation in G93A mice after down-hill running (**Supplementary**  
16 **Fig. 1d**).

17 We performed MG53 immunostaining in diaphragms derived from WT and G93A mice  
18 immediately after running. The whole-mount preparation (longitudinal view) (**Fig. 1e**) revealed  
19 distinct segments with increased MG53 in the G93A diaphragm, which were rarely seen in the WT  
20 diaphragm. In transverse sections (**Fig. 1f**), the increased MG53 staining clearly localized to the  
21 sarcolemma in some G93A myofibers (*red arrows*), in contrast to the predominantly intracellular  
22 distribution of MG53 in WT myofibers. This observation is consistent with the notion that G93A  
23 diaphragm muscles are susceptible to exercise-induced injury, and endogenous MG53 localizes to  
24 the areas of membrane damage in ALS muscle, consistent with its known functions in promoting  
25 plasma membrane repair.

26 Immunoblotting showed elevated MG53 levels in sera derived from the G93A mice after  
27 running (**Fig. 1g** and **Supplementary Fig. 2**), which correlates with the increases in serum CK  
28 levels (**Fig.1d**). A similar correlation between serum CK and MG53 measurements was reported  
29 in *mdx* mice, a model of Duchene muscular dystrophy with compromised muscle membrane  
30 repair[29]. Since these striking diaphragm and tibialis anterior myofiber injuries in the G93A mice

1 (2-month old) occur prior to the onset of ALS symptoms, these findings suggest that fragility of  
2 skeletal muscle represents an early pathological event in ALS.

3 *NMJ is an active site of injury-repair by MG53 under physiological conditions that is lost in ALS*

4 We showed previously that segmented mitochondrial defects appeared locally at NMJs in the  
5 G93A mice[20, 21]. This prompted us to examine whether the NMJ itself is an active site of  
6 contraction-induced membrane injury, and if MG53 plays a role in repair of NMJ injury.  
7 Immediately after the 30 min running, freshly isolated flexor digitorum brevis (FDB) myofibers  
8 from 2-month old mice were fixed for staining with  $\alpha$ -Bungarotoxin (BTX) to mark NMJ and anti-  
9 MG53 antibodies. We found that MG53 accumulated at the NMJ area and formed patches in WT  
10 myofibers (n = 130, 4 mice) (**Fig. 2a, left**), suggesting that MG53 contributes to the maintenance  
11 of NMJ integrity under physiologic conditions. While MG53 also accumulated at the NMJ area in  
12 G93A myofibers (n = 109, 3 mice), there were also separate intracellular MG53 aggregates in  
13 proximity to NMJs in about 10% of G93A myofibers (**Fig. 2a, right**, see also **Supplementary Fig.**  
14 **3**). Moreover, FDB myofibers derived from the G93A mice at an advanced stage of ALS (4-month  
15 old) showed increased abnormal MG53 aggregation near NMJs even without running (**Fig. 2b** and  
16 **Supplementary Fig. 4**). Such MG53 aggregation suggests potential impaired tissue-repair  
17 capacity that may manifest into NMJ degeneration during ALS disease progression.

18 Using the entry of a cell-impermeable fluorescent dye FM 1-43 as a measure of muscle  
19 myofiber integrity[23, 42], we tested the possibility that ALS-associated muscle injury originates  
20 focally at NMJs. **Fig. 2c** shows an overlay of FM 1-43 and BTX, indicating FM 1-43 enriches at  
21 NMJ when applied to the medium. In WT myofibers, FM 1-43 was restricted to the NMJ and there  
22 were barely any FM 1-43 signals inside myofibers after a 20 min dye incubation (**Fig. 2d**). In  
23 contrast, 59%  $\pm$  7% of FDB myofibers from three 4-month old G93A mice showed intracellular  
24 uptake of FM 1-43 dye, which formed a gradient centered around the NMJ (**Fig. 2e**), indicating  
25 that FM 1-43 dye entered the cells preferentially through injured NMJs.

26 We next examined whether exercise could exacerbate membrane injury at NMJs of G93A  
27 muscle. For this purpose, three pairs of 2-month old WT and G93A littermate mice performed the  
28 running protocol for 30 minutes. 72%  $\pm$  2% of G93A FDB myofibers showed NMJ-centered  
29 intracellular FM 1-43 gradient, whereas only 6%  $\pm$  2% WT myofibers exhibited this phenomenon  
30 (P < 0.001). These data substantiate the finding that NMJs are focally more susceptible to injury

1 than other regions of the sarcolemma, and exercise-induced NMJ injury is dramatically  
2 exacerbated in the G93A ALS mice.

3 In skeletal muscle, the cell surface membrane travels deep into the myofibril forming  
4 transverse tubules (T-tubules). Freshly isolated FDB myofibers were incubated with BTX,  
5 CellMask, and TMRE to locate the NMJs, T-tubule network and record mitochondrial potentials,  
6 respectively (**Fig. 2f**). Normal polarized mitochondria and organized T-tubule networks were  
7 observed in WT myofibers (**Fig. 2f, left**). Myofibers derived from the 4-month old G93A mice  
8 showed fully depolarized mitochondria at NMJs (**Fig. 2f, right**), and those derived from the 2-  
9 month old G93A mice showed partially depolarized mitochondria (**Fig. 2f, middle**). Remarkably,  
10 disorganized T-tubule networks were observed near the NMJs in both 2- and 4-month old G93A  
11 myofibers, including regional loss of T-tubules (hollow area under the NMJ) and formation of  
12 enlarged spheres. Pearson's Chi-squared tests demonstrated a significant correlation between T-  
13 tubule disruption and mitochondrial depolarization at the NMJ in both 2-month ( $P < 0.0001$ ) and  
14 4-month ( $P < 0.01$ ) G93A myofibers (**Fig. 2g**). These data confirm that mitochondrial dysfunction  
15 is associated with the disruption of cell membrane integrity at NMJs of the ALS muscle.

16 We and others have shown that mitochondrial dysfunction is associated with enhanced reactive  
17 oxygen species (ROS) production in the ALS mouse muscle[14, 18, 43], which could impact the  
18 intrinsic membrane repair function of MG53[44, 45]. Using our established live cell imaging  
19 method, we examined whether oxidative stress impact the traffic of MG53 vesicles inside C2C12  
20 cells overexpressing GFP-MG53[46]. The 2D x-y time-lapse images were continuously recorded  
21 for 10 seconds in the presence or absence (basal) of 1 mM H<sub>2</sub>O<sub>2</sub>. Representative images at 0 sec  
22 (0s, pseudo color green), 5 sec (5s, pseudo color red) and 10 sec (10s, pseudo color red) were  
23 selected for generating the overlay images (**Fig. 2h**). The overlay images of 0s with 5s or 0s with  
24 10s provide a visualization of GFP-MG53 vesicle dynamics. In the overlay images, non-moving  
25 vesicles are marked by yellow color (completely overlap), while moving vesicles are indicated by  
26 the red and green colors (no overlap). Note that there is almost no detectable movement of GFP-  
27 MG53 vesicles in the presence of H<sub>2</sub>O<sub>2</sub>, while moving GFP-MG53 vesicles were detected under  
28 basal condition.

29 *Impaired MG53 membrane repair function is a common pathological feature of ALS muscle*

30 With the support of the *Target ALS Human Postmortem Tissue Core*, we obtained paraffin-  
31 embedded diaphragm and psoas muscle sections from both sporadic and familial ALS decedents,

1 and non-ALS controls (**Supplementary Table 1** and **Supplementary Table 2**). Both longitudinal  
2 and transverse sections of human ALS diaphragm and psoas muscle showed dramatic abnormal  
3 sarcolemmal and intracellular MG53 aggregates. In contrast, the muscle samples of non-  
4 neurological control decedents showed only a few scattered MG53 aggregates (**Fig. 3a** and  
5 **Supplementary Fig. 5**). It is not unexpected to see a few MG53 aggregates in non-ALS muscle,  
6 as MG53-mediated membrane repair also occurs in normal conditions, but to a much lesser extent.  
7 As shown in **Fig. 3b**, this same staining pattern was observed in longitudinal (**Fig. 3b, left**) and  
8 transverse sections (**Fig. 3b, right**) of diaphragm muscle from the 4-month old G93A mice. The  
9 abnormal intracellular MG53 aggregation was observed in all 4-month old G93A muscles  
10 examined, including extensor digitorum longus (EDL), soleus, and tibialis anterior (TA)  
11 (**Supplementary Fig. 6a**). The data from both familial and sporadic ALS decedents and the G93A  
12 mouse model suggest that compromised MG53-mediated muscle membrane repair function could  
13 be a common pathology in ALS.

14 Enhanced EB retention in the diaphragm (**Fig. 3c**) and TA muscles (**Supplementary Fig. 6b**)  
15 was also observed in 4-month old G93A mice without running, indicating that muscle injury and  
16 fragility continue during ALS progression. Interestingly, the serum level of MG53 in the G93A  
17 mice at this late stage of ALS was lower compared with the WT littermates under resting  
18 conditions (**Fig. 3d**). As MG53 is a muscle-derived protein, the reduced serum MG53 level likely  
19 reflect the progressive loss of muscle mass. It is also possible that the formation of intracellular  
20 MG53 aggregates sequesters MG53, limiting its release into circulation. Nevertheless, these  
21 findings suggest that endogenous MG53 no longer can sustain the membrane repair function as  
22 ALS progresses.

### 23 *Recombinant human (rhMG53) preserves the membrane integrity of diaphragm in G93A mice*

24 Using an established protocol for evaluating the muscle cell membrane repair function  
25 following laser-induced cell membrane damage[23, 42], we conducted *in vitro* studies to test (1)  
26 whether G93A myofibers showed higher laser-induced fragility compared to WT myofibers, and  
27 (2) whether exogenous administration of rhMG53 could improve membrane integrity of G93A  
28 myofibers. A small area of the FDB myofiber (12 $\mu$ m X 12 $\mu$ m) was exposed to a high intensity UV  
29 laser to cause localized cell membrane injury allowing the entry of FM 1-43 dye. As shown in **Fig.**  
30 **4a**, G93A myofibers (4-month old) showed more intracellular accumulation of FM 1-43 compared  
31 with WT, indicating fragility and impaired cell membrane repair mechanism. 10  $\mu$ g/ml of rhMG53

1 applied to the culture medium reduced the intracellular accumulation of FM 1-43 in the G93A  
2 myofibers. Application of the same amount of bovine serum albumin (BSA) was ineffective. The  
3 time-dependent FM 1-43 accumulation following laser-induced injury is shown in **Fig. 4b**,  
4 demonstrating that extracellular application of rhMG53 improved the membrane repair function  
5 of the G93A muscle. Furthermore, G93A myofibers showed reduced mitochondrial ROS  
6 production after incubation with rhMG53 (2  $\mu$ g/ml) in the medium for 12 hours (**Fig. 4c**).

7 We next tested whether intravenous (IV) administration of 2 mg/kg rhMG53-Alexa (or BSA-  
8 Alexa as a control) in the G93A mice - immediately prior to running, attenuates diaphragm  
9 membrane injury. The dosage of rhMG53 was determined based on our previous publications with  
10 rhMG53 in preservation of membrane integrity in multiple organs[30, 32, 33]. After running,  
11 diaphragm muscles were immediately collected for live cell imaging of Alexa and EB  
12 simultaneously. As shown in **Fig. 4d**, mice treated with rhMG53-Alexa showed prominent  
13 membrane patches of MG53-Alexa, indicating that rhMG53-Alexa targets to injured diaphragm  
14 muscles, similar to the previous study with the *mdx* mice[29]. In contrast, diaphragm derived from  
15 the G93A mice receiving BSA-Alexa showed a diffuse pattern, indicating that BSA-Alexa could  
16 not form membrane patches (**Fig. 4e**). Compared with BSA-Alexa treated mice, the proportion of  
17 myofibers positive for intracellular accumulation of EB was significantly reduced in the diaphragm  
18 muscles from rhMG53-Alexa treated mice (**Fig. 4f**), confirming the efficacy of rhMG53 to  
19 preserve diaphragm membrane integrity *in vivo*.

#### 20 *Systemic application of rhMG53 preserved NMJ integrity and extended the life span of G93A mice*

21 Our ultimate goal is to develop rhMG53 as a treatment for ALS, which would be initiated after  
22 diagnosis – and thus after symptom onset – to ALS patients. Therefore, we evaluated the efficacy  
23 of rhMG53 administration to G93A mice after ALS onset by starting the treatment at the age of 3  
24 months[47]. We first adapted a method to quantify NMJ innervation in diaphragm muscle[48] of  
25 adult mice. **Fig. 5a** shows a representative image of a mouse diaphragm stained with anti-  
26 neurofilament (NF) antibodies (red fluorescence) and BTX (green fluorescence). By changing the  
27 focal plane and performing a 3D-scan of a zoomed-in area, we could examine NMJ in the entire  
28 diaphragm. The 3D-scan projection allowed us to distinguish well innervated NMJs from partially  
29 innervated or denervated NMJ (**Fig. 5b**). Then, ten G93A mice (3-month old) were divided into  
30 two cohorts, one received IV injection of rhMG53 (2 mg/kg, daily), and the other received saline  
31 for 2 weeks. **Fig. 5c** shows representative 3D-projection images of the diaphragm muscle from



1 rhMG53 and saline treated mice. The innervated NMJ area was defined by the overlapping area  
2 between BTX and NF signals. Quantitative analyses of NMJ innervation are presented in **Fig. 5d**,  
3 demonstrating that rhMG53 treatment could significantly preserve NMJ integrity, maintain well  
4 innervated and partially innervated NMJs, as well as reduce the proportion of denervated NMJs  
5 compared with saline-treated controls. In a separated experiment, motor neurons in the anterior  
6 horn region (Nissl staining-positive with diameter larger than 25  $\mu\text{m}$ ) were counted (**Fig. 5e and**  
7 **5f**). The 2-week rhMG53 treatment significantly preserved the number of motor neurons in spinal  
8 cords from the G93A mice (rhMG53 vs saline,  $P < 0.01$ ) (**Fig. 5g**), suggesting that this treatment  
9 also alleviated motor neuron degeneration.

10 Endogenous MG53 is predominantly expressed in striated muscle[23, 49], but not in  
11 neurons[33]. Under physiological condition, MG53 in circulation does not cross the brain blood  
12 barrier[33]. Therefore, it was unlikely that rhMG53 in circulation directly reached the motor  
13 neuron in spinal cord to protect its function. As ALS appears to be a combination of “dying-  
14 forward” and/or “dying-back” pathophysiological processes, and the NMJ is the critical site for  
15 this bidirectional crosstalk between motor neurons and myofibers, we speculate that the effects of  
16 rhMG53 on preserving anterior horn motor neuron cell bodies is likely secondary to the  
17 preservation of NMJ integrity, which slows the dying back process. Contributions from a direct  
18 effect on motor neurons remain possible.

19 The short half-life of rhMG53 in circulation (~1 hour) may present a hurdle for treating chronic  
20 tissue injuries in ALS[32, 50]. PEGylation is a well-established method for increasing the half-life  
21 of therapeutic proteins in circulation[39, 51]. Addition of polyethylene glycol (PEG) often reduces  
22 immunogenicity of the PEGylated proteins without a major loss of their biological activity[52-54]  
23 and several PEGylated proteins have reached the market[54, 55]. We produced PEGylated  
24 rhMG53 (PEG-rhMG53). As shown in **Fig. 6a**, PEGylation of rhMG53 is successful based on the  
25 oligomerization pattern of the protein run on SDS-PAGE. We previously developed an *in vitro*  
26 assay to evaluate the efficacy of rhMG53 in protecting against membrane damage by measuring  
27 LDH in the extracellular solution of culture cells, as LDH leaks from the cell into the extracellular  
28 solution following cell membrane injury[25, 26, 29, 56]. The PEG-modification did not affect the  
29 membrane repair function of rhM53 as the  $EC_{50}$  of LDH release did not change (**Fig. 6b**).  
30 Meanwhile the half-life of PEG-rhMG53 increased in circulation from 0.5 to 12 hours (**Fig. 6c**).



1 This elongated half-life in circulation allowed us to test the PEG-rhMG53 in G93A mice by IV  
2 injection in every other day for a longer period.

3 The PEG-rhMG53 (2 mg/kg, IV) was administered to the G93A mice (3-month old) every  
4 other day for 30 days. Twenty-six G93A littermate mice (from 3 litters, with both genders  
5 included) were divided into two groups, one receiving PEG-rhMG53, and the other receiving  
6 saline as a control. The bodyweights of the PEG-rhMG53 or saline treated mice were recorded.  
7 One-month of PEG-rhMG53 treatment slowed weight loss compared with the saline treated G93A  
8 mice (**Fig. 6d**). Note that the weight loss of PEG-rhMG53-treated mice accelerated again after the  
9 treatment ended. This is not unexpected, as the half-life of PEG-rhMG53 is only 12 hours in rodent  
10 circulation (**Fig. 6c**). This one-month treatment of PEG-rhMG53 also significantly extended the  
11 life span of G93A mice from  $124 \pm 6$  days (saline) to  $137 \pm 9$  days (PEG-rhMG53) (**Fig. 6e**). The  
12 endpoint (death) of a G93A mouse was defined by the loss of righting reflex within 30 sec when  
13 the mouse was placed on its side. The survival days of individual treated G93A mice and the  
14 statistics for both genders were listed in **Supplementary Table 3**. While the cohorts were not  
15 perfectly gender-balanced per litter, the therapeutic benefits of rhMG53 on survival remained  
16 when male and female mice were considered separately (survival increased to  $137 \pm 7$  for male  
17 mice and  $135 \pm 10$  for females), when compared to the saline-treated G93A littermate mice. The  
18 Chi square test further confirmed that the significant difference between PEG-rhMG53 and saline  
19 treated groups is independent of the gender.

20 **Supplementary Movie 1** illustrates that G93A mice receiving one month of PEG-rhMG53  
21 treatment showed greater mobility compared with saline-treated mice. We tracked the total moving  
22 distance of each mouse during one-minute video recordings. The tracking maps indicate that  
23 paralysis was more advanced in saline-treated mice, and the time period under constrained motion  
24 was significantly shorter in the mice treated with PEG-rhMG53 (**Fig. 6f**). In a separate study, we  
25 found that 3-month old G93A mice that received 2-week rhMG53 treatment (2 mg/kg, daily IV  
26 injection) showed reduced collapsing time of the hind limbs during the tail suspension test at the  
27 age of 104 days (**Fig. 6g**).

## 28 Discussion

29 We have demonstrated that muscle membrane fragility and damage are increased in ALS  
30 G93A mice prior to symptom onset and continue to increase throughout the course of the disease.  
31 Furthermore, our study reveals that the site of NMJs are particularly susceptible to injury compared

1 to the rest of the sarcolemma, and MG53 forms membrane patches at NMJ following modest  
2 exercise training. Thus, MG53 represents an important physiologic component of protection  
3 against injury to the NMJ. Systemic administration of exogenous rhMG53 has beneficial effects  
4 to restore diaphragm muscle repair and NMJ integrity and improved the life span of the G93A  
5 mice. Abnormal intracellular aggregation of MG53 was observed in multiple types of muscles  
6 from the G93A mice. Similarly, the abnormal aggregates were seen in muscle samples from human  
7 ALS decedents with both sporadic and familial forms of ALS.

8 While transient intracellular oxidation initiates MG53-vesicles to form repair-patches[23],  
9 exposure of cells to sustained oxidative stress leads to immobilization of MG53's membrane repair  
10 function[44]. It is known that mitochondrial dysfunction in ALS causes intracellular oxidative  
11 stress, thus elevated ROS could impede normal MG53 movement to areas of sarcolemmal damage,  
12 resulting in the observed aggregation and loss of its tissue repair function. A proposed mechanism  
13 underlying the membrane repair defects at the NMJ of ALS is illustrated in **Fig. 6h**. Since NMJ is  
14 an active site of neuron-muscle crosstalk, it is conceivable that membrane repair defects initiate  
15 from NMJ. MG53 plays a critical role in maintaining the integrity of NMJ and the muscle  
16 membrane. During ALS progression, mitochondrial dysfunction causes elevated ROS production,  
17 leading to ectopic MG53 aggregation and disruption of MG53's tissue repair function, which could  
18 exacerbate NMJ denervation. Oxidative stress, muscle membrane damage and NMJ denervation  
19 could form a vicious cycle promoting muscle wasting and neuronal death in ALS. We demonstrate  
20 that exogenously administered rhMG53 forms repair-patches and reduces membrane leakage of  
21 the ALS diaphragm muscle. It is possible that reduced cell membrane leakage lowers the energy  
22 demand and subsequent mitochondrial ROS production, alleviating this vicious cycle to preserve  
23 the integrity of NMJ and muscle membrane, which could also slow down the dying-back process  
24 of motor neuron degeneration.

25 IV administration of rhMG53 or PEG-rhMG53 to the G93A mice after disease onset preserved  
26 innervation of the diaphragm and prolonged the lifespan. Studies in mice, rats, and dogs reported  
27 no observable toxic effects with long-term administration of rhMG53[29, 32, 36]. While we  
28 demonstrate that repetitive IV administration of the PEG-rhMG53 has beneficial effects on G93A  
29 ALS mice, further studies are still required to establish the safety profile of the chemically  
30 modified rhMG53, and to test the therapeutic efficacy in other ALS animal models.

1 In rodents and humans, MG53 is present at low levels in blood circulation under physiologic  
2 conditions. Given that we observed higher circulating levels in the G93A mice than wild-type  
3 littermates, and a correlation with serum CK measurements, it is possible that ALS patients also  
4 show different levels of circulating MG53. We intend to examine this further in future studies,  
5 including the possibilities that (1) a one-time measurement of MG53 early in disease course could  
6 be useful as a “prognostic biomarker” of rate of disease progression, (2) a “predictive biomarker”  
7 to identify/cohort select patients who might best respond to therapeutic strategies designed to  
8 stabilize/repair damage to myofibers, or (3) a pharmacodynamic biomarker to demonstrate  
9 therapeutic effect of treatments to preserve myofiber membrane integrity, including exogenously  
10 administered PEG-rhMG53.

11 The effects of exercise training on ALS progression remains controversial[57, 58], and  
12 diaphragm pacing was found to be associated with reduced survival in ALS patients with  
13 respiratory insufficiency[59-63]. Our study with the ALS mice demonstrates that even modest  
14 exercise training leads to increased damage to the diaphragm, which may exacerbate ALS  
15 progression. This appears to be due to the severely compromised membrane repair capacity of the  
16 ALS muscle. Based on this finding, one should be cautious in designing exercise-related protocols  
17 or diaphragm pacing as alternative interventions to mitigate ALS. However, it might suggest that  
18 exercise regimens and/or diaphragm pacing in the presence of exogenously administered rhMG53  
19 could be beneficial.

20 In summary, we have identified defective muscle membrane repair involving MG53 as a  
21 pathological change in ALS mice and postmortem human ALS muscle. Muscle membrane injury  
22 occurs early in the course of ALS and contributes to disruption of NMJs. Our study provides proof-  
23 of-concept data supporting the beneficial effects of rhMG53 in preserving the integrity of NMJ  
24 and muscle cell membrane to alleviate ALS progression. Probing the role of mitochondrial ROS  
25 production in modulating MG53-mediated cell membrane repair may have broader implications  
26 in understanding the basic pathophysiology of ALS.

27  
28

1 **Acknowledgments:**

2 We greatly appreciate Kathryn Wilsbach, Kathryn Gallo, Brent Harris, and Galam Khan for  
3 providing paraffin-embedded human muscle sections from the Johns Hopkins University and  
4 Georgetown University sites of the *Target ALS Postmortem Tissue Core* and the *Johns Hopkins*  
5 *ALS Postmortem Core*; Ms. Erin Haggard for language editing of this manuscript.

6 **Funding:**

7 Jingsong Zhou was supported by grants from the Department of Defense  
8 AL170061(W81XWH1810684), NIH grants (R01NS105621 and R01 HL138570), Bank of  
9 America Victor E. Speas Foundation, ALS Association (16-IIP-288) and a pilot grant from Kansas  
10 City Consortium on Musculoskeletal Diseases. Jianjie Ma was supported by NIH grants  
11 (R01AG056919, R01AR061385, R01AR070752 and R01DK106394).

12 **Author contributions:**

13 J.Y., J.Z., and J.M. conceived and designed the project; J.Z., J.M., L.O., A.L., J.Y., and X.L. wrote  
14 the paper; J.Y., A.L., X.L., K.H.P., X.Z., F.Y., Y.X., D.Y., T.T., and J.Z. acquired the data; J.Y.,  
15 A.L., X.L., L.O., J.M. and J.Z. analyzed and interpreted the data.

16 **Competing interests:**

17 J.M. and T.T. have an equity interest in TRIM-edicine, Inc., which develops rhMG53 for the  
18 treatment of human diseases. Patents on the use of MG53 are held by Rutgers University – Robert  
19 Wood Johnson Medical School and The Ohio State University.

20

1 **Supplementary Materials**

2 **Supplementary Fig. 1.** Representative images of TA muscle derived from G93A and WT mice  
3 (2-month old) with 30 min running that received EB injection 16 hours early.

4 **Supplementary Fig. 2.** Additional Western blot data for Figure 1G.

5 **Supplementary Fig. 3.** Additional representative images for Figure 2A.

6 **Supplementary Fig. 4.** Additional representative images for Figure 2B.

7 **Supplementary Fig. 5.** Additional images of anti-MG53 immunostaining of ALS and non-ALS  
8 human muscle samples.

9 **Supplementary Fig. 6.** Additional anti-MG53 immunostaining and EB retention results of  
10 muscle samples from G93A and WT mice.

11 **Supplementary Table 1.** Demographics of human decedents.

12 **Supplementary Table 2.** Biospecimen information for human samples.

13 **Supplementary Table 3.** The survival days of individual tested G93A mice separated by gender.

14 **Supplementary Movie 1.** Video of PEG-rhMG53 treated and control G93A mice.

15

16

## 1 **References and Notes:**

- 2 [1] P.I. Joyce, P. Fratta, E.M. Fisher, A. Acevedo-Arozena, SOD1 and TDP-43 animal models of amyotrophic  
3 lateral sclerosis: recent advances in understanding disease toward the development of clinical treatments,  
4 *Mammalian genome : official journal of the International Mammalian Genome Society* 22(7-8) (2011) 420-48.
- 5 [2] A. Alonso, G. Logroscino, S.S. Jick, M.A. Hernan, Incidence and lifetime risk of motor neuron disease in the  
6 United Kingdom: a population-based study, *European journal of neurology : the official journal of the European*  
7 *Federation of Neurological Societies* 16(6) (2009) 745-51.
- 8 [3] S. Niedermeyer, M. Murn, P.J. Choi, Respiratory Failure in Amyotrophic Lateral Sclerosis, *Chest* 155(2) (2019)  
9 401-408.
- 10 [4] M. de Carvalho, M. Swash, S. Pinto, Diaphragmatic Neurophysiology and Respiratory Markers in ALS, *Front*  
11 *Neurol* 10 (2019) 143.
- 12 [5] S. Boillee, C. Vande Velde, D.W. Cleveland, ALS: a disease of motor neurons and their nonneuronal neighbors,  
13 *Neuron* 52(1) (2006) 39-59.
- 14 [6] M. Dadon-Nachum, E. Melamed, D. Offen, The "dying-back" phenomenon of motor neurons in ALS, *Journal of*  
15 *molecular neuroscience : MN* 43(3) (2011) 470-7.
- 16 [7] G. Dobrowolny, M. Aucello, E. Rizzuto, S. Beccafico, C. Mammucari, S. Boncompagni, S. Belia, F. Wannenes,  
17 C. Nicoletti, Z. Del Prete, N. Rosenthal, M. Molinaro, F. Protasi, G. Fano, M. Sandri, A. Musaro, Skeletal muscle is  
18 a primary target of SOD1G93A-mediated toxicity, *Cell Metab* 8(5) (2008) 425-36.
- 19 [8] L.R. Fischer, D.G. Culver, P. Tennant, A.A. Davis, M. Wang, A. Castellano-Sanchez, J. Khan, M.A. Polak, J.D.  
20 Glass, Amyotrophic lateral sclerosis is a distal axonopathy: evidence in mice and man, *Exp Neurol* 185(2) (2004)  
21 232-40.
- 22 [9] D. Frey, C. Schneider, L. Xu, J. Borg, W. Spooren, P. Caroni, Early and selective loss of neuromuscular synapse  
23 subtypes with low sprouting competence in motoneuron diseases, *J Neurosci* 20(7) (2000) 2534-42.
- 24 [10] E. Lepore, I. Casola, G. Dobrowolny, A. Musaro, Neuromuscular Junction as an Entity of Nerve-Muscle  
25 Communication, *Cells* 8(8) (2019).
- 26 [11] G. Luo, J. Yi, C. Ma, Y. Xiao, F. Yi, T. Yu, J. Zhou, Defective mitochondrial dynamics is an early event in  
27 skeletal muscle of an amyotrophic lateral sclerosis mouse model, *PloS one* 8(12) (2013) e82112.
- 28 [12] A. Musaro, Understanding ALS: new therapeutic approaches, *The FEBS journal* 280(17) (2013) 4315-22.
- 29 [13] M. Wong, L.J. Martin, Skeletal muscle-restricted expression of human SOD1 causes motor neuron  
30 degeneration in transgenic mice, *Human molecular genetics* 19(11) (2010) 2284-302.
- 31 [14] Y. Xiao, C. Karam, J. Yi, L. Zhang, X. Li, D. Yoon, H. Wang, K. Dhakal, P. Ramlow, T. Yu, Z. Mo, J. Ma, J.  
32 Zhou, ROS-related mitochondrial dysfunction in skeletal muscle of an ALS mouse model during the disease  
33 progression, *Pharmacol Res* (2018).
- 34 [15] B. Schmid, A. Hruscha, S. Hogl, J. Banzhaf-Strathmann, K. Strecker, J. van der Zee, M. Teucke, S. Eimer, J.  
35 Hegermann, M. Kittelmann, E. Kremmer, M. Cruts, B. Solchenberger, L. Hasenkamp, F. van Bebber, C. Van  
36 Broeckhoven, D. Edbauer, S.F. Lichtenthaler, C. Haass, Loss of ALS-associated TDP-43 in zebrafish causes muscle  
37 degeneration, vascular dysfunction, and reduced motor neuron axon outgrowth, *Proceedings of the National*  
38 *Academy of Sciences of the United States of America* 110(13) (2013) 4986-91.
- 39 [16] M.D. Cykowski, D.W. Dickson, S.Z. Powell, A.S. Arumanayagam, A.L. Rivera, S.H. Appel, Dipeptide repeat  
40 (DPR) pathology in the skeletal muscle of ALS patients with C9ORF72 repeat expansion, *Acta neuropathologica*  
41 138(4) (2019) 667-670.
- 42 [17] L. Dupuis, J.L. Gonzalez de Aguilar, A. Echaniz-Laguna, J. Eschbach, F. Rene, H. Oudart, B. Halter, C. Huze,  
43 L. Schaeffer, F. Bouillaud, J.P. Loeffler, Muscle mitochondrial uncoupling dismantles neuromuscular junction and  
44 triggers distal degeneration of motor neurons, *PloS one* 4(4) (2009) e5390.
- 45 [18] C. Karam, J. Yi, Y. Xiao, K. Dhakal, L. Zhang, X. Li, C. Manno, J. Xu, K. Li, H. Cheng, J. Ma, J. Zhou,  
46 Absence of physiological Ca<sup>2+</sup> transients is an initial trigger for mitochondrial dysfunction in skeletal muscle  
47 following denervation, *Skeletal muscle* 7(1) (2017) 6.
- 48 [19] J. Magrane, C. Cortez, W.B. Gan, G. Manfredi, Abnormal mitochondrial transport and morphology are  
49 common pathological denominators in SOD1 and TDP43 ALS mouse models, *Human molecular genetics* 23(6)  
50 (2014) 1413-24.
- 51 [20] J. Yi, C. Ma, Y. Li, N. Weisleder, E. Rios, J. Ma, J. Zhou, Mitochondrial calcium uptake regulates rapid  
52 calcium transients in skeletal muscle during excitation-contraction (E-C) coupling, *J Biol Chem* 286(37) (2011)  
53 32436-43.



- 1 [21] J. Zhou, J. Yi, R. Fu, E. Liu, T. Siddique, E. Rios, H.X. Deng, Hyperactive intracellular calcium signaling  
2 associated with localized mitochondrial defects in skeletal muscle of an animal model of amyotrophic lateral  
3 sclerosis, *J Biol Chem* 285(1) (2010) 705-12.
- 4 [22] K. Ozato, D.M. Shin, T.H. Chang, H.C. Morse, 3rd, TRIM family proteins and their emerging roles in innate  
5 immunity, *Nature reviews. Immunology* 8(11) (2008) 849-60.
- 6 [23] C. Cai, H. Masumiya, N. Weisleder, N. Matsuda, M. Nishi, M. Hwang, J.K. Ko, P. Lin, A. Thornton, X. Zhao,  
7 Z. Pan, S. Komazaki, M. Brotto, H. Takeshima, J. Ma, MG53 nucleates assembly of cell membrane repair  
8 machinery, *Nature cell biology* 11(1) (2009) 56-64.
- 9 [24] C. Cai, N. Weisleder, J.K. Ko, S. Komazaki, Y. Sunada, M. Nishi, H. Takeshima, J. Ma, Membrane repair  
10 defects in muscular dystrophy are linked to altered interaction between MG53, caveolin-3, and dysferlin, *J Biol*  
11 *Chem* 284(23) (2009) 15894-902.
- 12 [25] P. Lin, H. Zhu, C. Cai, X. Wang, C. Cao, R. Xiao, Z. Pan, N. Weisleder, H. Takeshima, J. Ma, Nonmuscle  
13 myosin IIA facilitates vesicle trafficking for MG53-mediated cell membrane repair, *FASEB journal : official*  
14 *publication of the Federation of American Societies for Experimental Biology* 26(5) (2012) 1875-83.
- 15 [26] H. Zhu, P. Lin, G. De, K.H. Choi, H. Takeshima, N. Weisleder, J. Ma, Polymerase transcriptase release factor  
16 (PTRF) anchors MG53 protein to cell injury site for initiation of membrane repair, *J Biol Chem* 286(15) (2011)  
17 12820-4.
- 18 [27] C. Cai, H. Masumiya, N. Weisleder, Z. Pan, M. Nishi, S. Komazaki, H. Takeshima, J. Ma, MG53 regulates  
19 membrane budding and exocytosis in muscle cells, *J Biol Chem* 284(5) (2009) 3314-22.
- 20 [28] C.M. Cao, Y. Zhang, N. Weisleder, C. Ferrante, X. Wang, F. Lv, Y. Zhang, R. Song, M. Hwang, L. Jin, J. Guo,  
21 W. Peng, G. Li, M. Nishi, H. Takeshima, J. Ma, R.P. Xiao, MG53 constitutes a primary determinant of cardiac  
22 ischemic preconditioning, *Circulation* 121(23) (2010) 2565-74.
- 23 [29] N. Weisleder, N. Takizawa, P. Lin, X. Wang, C. Cao, Y. Zhang, T. Tan, C. Ferrante, H. Zhu, P.J. Chen, R. Yan,  
24 M. Sterling, X. Zhao, M. Hwang, M. Takeshima, C. Cai, H. Cheng, H. Takeshima, R.P. Xiao, J. Ma, Recombinant  
25 MG53 protein modulates therapeutic cell membrane repair in treatment of muscular dystrophy, *Science translational*  
26 *medicine* 4(139) (2012) 139ra85.
- 27 [30] Y. Jia, K. Chen, P. Lin, G. Lieber, M. Nishi, R. Yan, Z. Wang, Y. Yao, Y. Li, B.A. Whitson, P. Duann, H. Li,  
28 X. Zhou, H. Zhu, H. Takeshima, J.C. Hunter, R.L. McLeod, N. Weisleder, C. Zeng, J. Ma, Treatment of acute lung  
29 injury by targeting MG53-mediated cell membrane repair, *Nature communications* 5 (2014) 4387.
- 30 [31] J. Liu, H. Zhu, Y. Zheng, Z. Xu, L. Li, T. Tan, K.H. Park, J. Hou, C. Zhang, D. Li, R. Li, Z. Liu, N. Weisleder,  
31 D. Zhu, P. Lin, J. Ma, Cardioprotection of recombinant human MG53 protein in a porcine model of ischemia and  
32 reperfusion injury, *Journal of molecular and cellular cardiology* 80 (2015) 10-9.
- 33 [32] P. Duann, H. Li, P. Lin, T. Tan, Z. Wang, K. Chen, X. Zhou, K. Gumpfer, H. Zhu, T. Ludwig, P.J. Mohler, B.  
34 Rovin, W.T. Abraham, C. Zeng, J. Ma, MG53-mediated cell membrane repair protects against acute kidney injury,  
35 *Science translational medicine* 7(279) (2015) 279ra36.
- 36 [33] Y. Yao, B. Zhang, H. Zhu, H. Li, Y. Han, K. Chen, Z. Wang, J. Zeng, Y. Liu, X. Wang, Y. Li, D. He, P. Lin, X.  
37 Zhou, K.H. Park, Z. Bian, Z. Chen, N. Gong, T. Tan, J. Zhou, M. Zhang, J. Ma, C. Zeng, MG53 permeates through  
38 blood-brain barrier to protect ischemic brain injury, *Oncotarget* (2016).
- 39 [34] M.E. Gurney, H. Pu, A.Y. Chiu, M.C. Dal Canto, C.Y. Polchow, D.D. Alexander, J. Caliendo, A. Hentati,  
40 Y.W. Kwon, H.X. Deng, et al., Motor neuron degeneration in mice that express a human Cu,Zn superoxide  
41 dismutase mutation, *Science* 264(5166) (1994) 1772-5.
- 42 [35] S. Pouvreau, L. Royer, J. Yi, G. Brum, G. Meissner, E. Rios, J. Zhou, Ca(2+) sparks operated by membrane  
43 depolarization require isoform 3 ryanodine receptor channels in skeletal muscle, *Proceedings of the National*  
44 *Academy of Sciences of the United States of America* 104(12) (2007) 5235-40.
- 45 [36] Z. Bian, Q. Wang, X. Zhou, T. Tan, K.H. Park, H.F. Kramer, A. McDougal, N.J. Laping, S. Kumar, T.M.A.  
46 Adesanya, M. Sermersheim, F. Yi, X. Wang, J. Wu, K. Gumpfer, Q. Jiang, D. He, P.H. Lin, H. Li, F. Guan, J.  
47 Zhou, M.J. Kohr, C. Zeng, H. Zhu, J. Ma, Sustained elevation of MG53 in the bloodstream increases tissue  
48 regenerative capacity without compromising metabolic function, *Nature communications* 10(1) (2019) 4659.
- 49 [37] H.L. Chandler, T. Tan, C. Yang, A.J. Gemensky-Metzler, R.F. Wehrman, Q. Jiang, C.M.W. Peterson, B. Geng,  
50 X. Zhou, Q. Wang, D. Kaili, T.M.A. Adesanya, F. Yi, H. Zhu, J. Ma, MG53 promotes corneal wound healing and  
51 mitigates fibrotic remodeling in rodents, *Communications biology* 2 (2019) 71.
- 52 [38] T.M.A. Adesanya, M. Russell, K.H. Park, X. Zhou, M.A. Sermersheim, K. Gumpfer, S.N. Koenig, T. Tan,  
53 B.A. Whitson, P.M.L. Janssen, J. Lincoln, H. Zhu, J. Ma, MG 53 Protein Protects Aortic Valve Interstitial Cells  
54 From Membrane Injury and Fibrocalcific Remodeling, *J Am Heart Assoc* 8(4) (2019) e009960.



- 1 [39] R. Webster, E. Didier, P. Harris, N. Siegel, J. Stadler, L. Tilbury, D. Smith, PEGylated proteins: evaluation of  
2 their safety in the absence of definitive metabolism studies, *Drug metabolism and disposition: the biological fate of*  
3 *chemicals* 35(1) (2007) 9-16.
- 4 [40] F. De Giorgio, C. Maduro, E.M.C. Fisher, A. Acevedo-Aroza, Transgenic and physiological mouse models  
5 give insights into different aspects of amyotrophic lateral sclerosis, *Dis Model Mech* 12(1) (2019).
- 6 [41] P. McGoldrick, P.I. Joyce, E.M. Fisher, L. Greensmith, Rodent models of amyotrophic lateral sclerosis,  
7 *Biochimica et biophysica acta* 1832(9) (2013) 1421-36.
- 8 [42] P.L. McNeil, K. Miyake, S.S. Vogel, The endomembrane requirement for cell surface repair, *Proceedings of the*  
9 *National Academy of Sciences of the United States of America* 100(8) (2003) 4592-7.
- 10 [43] F.L. Muller, W. Song, Y.C. Jang, Y. Liu, M. Sabia, A. Richardson, H. Van Remmen, Denervation-induced  
11 skeletal muscle atrophy is associated with increased mitochondrial ROS production, *American journal of*  
12 *physiology. Regulatory, integrative and comparative physiology* 293(3) (2007) R1159-68.
- 13 [44] M. Hwang, J.K. Ko, N. Weisleder, H. Takeshima, J. Ma, Redox-dependent oligomerization through a leucine  
14 zipper motif is essential for MG53-mediated cell membrane repair, *American journal of physiology. Cell physiology*  
15 301(1) (2011) C106-14.
- 16 [45] H. Ma, J. Liu, Z. Bian, Y. Cui, X. Zhou, B. Zhang, T.M. Adesanya, F. Yi, K.H. Park, T. Tan, Z. Chen, H. Zhu,  
17 Effect of metabolic syndrome on mitsugumin 53 expression and function, *PLoS one* 10(5) (2015) e0124128.
- 18 [46] H. Wang, J. Yi, X. Li, Y. Xiao, K. Dhakal, J. Zhou, ALS-associated mutation SOD1(G93A) leads to abnormal  
19 mitochondrial dynamics in osteocytes, *Bone* 106 (2018) 126-138.
- 20 [47] A.C. Ludolph, C. Bendotti, E. Blaugrund, A. Chio, L. Greensmith, J.P. Loeffler, R. Mead, H.G. Niessen, S.  
21 Petri, P.F. Pradat, W. Robberecht, M. Ruegg, B. Schwalenstocker, D. Stiller, L. van den Berg, F. Vieira, S. von  
22 Horsten, Guidelines for preclinical animal research in ALS/MND: A consensus meeting, *Amyotroph Lateral Scler*  
23 11(1-2) (2010) 38-45.
- 24 [48] H. Wu, L. Mei, Morphological analysis of neuromuscular junctions by immunofluorescent staining of whole-  
25 mount mouse diaphragms, *Methods in molecular biology* 1018 (2013) 277-85.
- 26 [49] J.S. Yi, J.S. Park, Y.M. Ham, N. Nguyen, N.R. Lee, J. Hong, B.W. Kim, H. Lee, C.S. Lee, B.C. Jeong, H.K.  
27 Song, H. Cho, Y.K. Kim, J.S. Lee, K.S. Park, H. Shin, I. Choi, S.H. Lee, W.J. Park, S.Y. Park, C.S. Choi, P. Lin, M.  
28 Karunasiri, T. Tan, P. Duann, H. Zhu, J. Ma, Y.G. Ko, MG53-induced IRS-1 ubiquitination negatively regulates  
29 skeletal myogenesis and insulin signalling, *Nature communications* 4 (2013) 2354.
- 30 [50] N. Weisleder, H. Takeshima, J. Ma, Mitsugumin 53 (MG53) facilitates vesicle trafficking in striated muscle to  
31 contribute to cell membrane repair, *Commun Integr Biol* 2(3) (2009) 225-6.
- 32 [51] S. Jablonka, B. Holtmann, M. Sendtner, F. Metzger, Therapeutic effects of PEGylated insulin-like growth  
33 factor I in the pmn mouse model of motoneuron disease, *Exp Neurol* 232(2) (2011) 261-9.
- 34 [52] A. Basu, K. Yang, M. Wang, S. Liu, R. Chintala, T. Palm, H. Zhao, P. Peng, D. Wu, Z. Zhang, J. Hua, M.C.  
35 Hsieh, J. Zhou, G. Petti, X. Li, A. Janjua, M. Mendez, J. Liu, C. Longley, Z. Zhang, M. Mehlig, V. Borowski, M.  
36 Viswanathan, D. Filpula, Structure-function engineering of interferon-beta-1b for improving stability, solubility,  
37 potency, immunogenicity, and pharmacokinetic properties by site-selective mono-PEGylation, *Bioconjugate*  
38 *chemistry* 17(3) (2006) 618-30.
- 39 [53] J.M. Harris, R.B. Chess, Effect of pegylation on pharmaceuticals, *Nat Rev Drug Discov* 2(3) (2003) 214-21.
- 40 [54] J.S. Kang, P.P. Deluca, K.C. Lee, Emerging PEGylated drugs, *Expert Opin Emerg Drugs* 14(2) (2009) 363-80.
- 41 [55] F.M. Veronese, A. Mero, The impact of PEGylation on biological therapies, *BioDrugs* 22(5) (2008) 315-29.
- 42 [56] H. Li, P. Duann, P.H. Lin, L. Zhao, Z. Fan, T. Tan, X. Zhou, M. Sun, M. Fu, M. Orange, M. Sermersheim, H.  
43 Ma, D. He, S.M. Steinberg, R. Higgins, H. Zhu, E. John, C. Zeng, J. Guan, J. Ma, Modulation of wound healing and  
44 scar formation by MG53 protein-mediated cell membrane repair, *The Journal of biological chemistry* 290(40)  
45 (2015) 24592-603.
- 46 [57] J.M. Shefner, Effects of Strength Training in Amyotrophic Lateral Sclerosis: How Much Do We Know?,  
47 *Muscle & nerve* 59(1) (2019) 6-7.
- 48 [58] S. Tsitkanou, P. Della Gatta, V. Foletta, A. Russell, The Role of Exercise as a Non-pharmacological  
49 Therapeutic Approach for Amyotrophic Lateral Sclerosis: Beneficial or Detrimental?, *Front Neurol* 10 (2019) 783.
- 50 [59] P.W.C. Di, P.S.G.C. Di, Safety and efficacy of diaphragm pacing in patients with respiratory insufficiency due  
51 to amyotrophic lateral sclerosis (DiPALS): a multicentre, open-label, randomised controlled trial, *Lancet Neurol*  
52 14(9) (2015) 883-892.
- 53 [60] J. Gonzalez-Bermejo, C. Morelot-Panzini, M.L. Tanguy, V. Meininger, P.F. Pradat, T. Lenglet, G. Bruneteau,  
54 N.L. Forestier, P. Couratier, N. Guy, C. Desnuelle, H. Prigent, C. Perrin, V. Attali, C. Fargeot, M.C. Nierat, C.  
55 Royer, F. Menegaux, F. Salachas, T. Similowski, Early diaphragm pacing in patients with amyotrophic lateral  
56 sclerosis (RespiStimALS): a randomised controlled triple-blind trial, *Lancet Neurol* 15(12) (2016) 1217-1227.

- 1 [61] C.J. McDermott, M.J. Bradburn, C. Maguire, C.L. Cooper, W.O. Baird, S.K. Baxter, J. Cohen, H. Cantrill, S.  
2 Dixon, R. Ackroyd, S. Baudouin, A. Bentley, R. Berrisford, S. Bianchi, S.C. Bourke, R. Darlison, J. Ealing, M.  
3 Elliott, P. Fitzgerald, S. Galloway, H. Hamdalla, C.O. Hanemann, P. Hughes, I. Imam, D. Karat, R. Leek, N.  
4 Maynard, R.W. Orrell, A. Sarela, J. Stradling, K. Talbot, L. Taylor, M. Turner, A.K. Simonds, T. Williams, W.  
5 Wedzicha, C. Young, P.J. Shaw, DiPALS: Diaphragm Pacing in patients with Amyotrophic Lateral Sclerosis - a  
6 randomised controlled trial, *Health Technol Assess* 20(45) (2016) 1-186.  
7 [62] R.G. Miller, R.A. Lewis, Diaphragm pacing in patients with amyotrophic lateral sclerosis, *Lancet Neurol* 15(6)  
8 (2016) 542.  
9 [63] H. Wood, Motor neuron disease: Diaphragm pacing is associated with reduced survival in ALS patients with  
10 respiratory insufficiency, *Nature reviews. Neurology* 11(9) (2015) 484.  
11  
12

1 **Fig. 1. Diaphragm susceptibility to membrane injury is an early pathological event in ALS.**

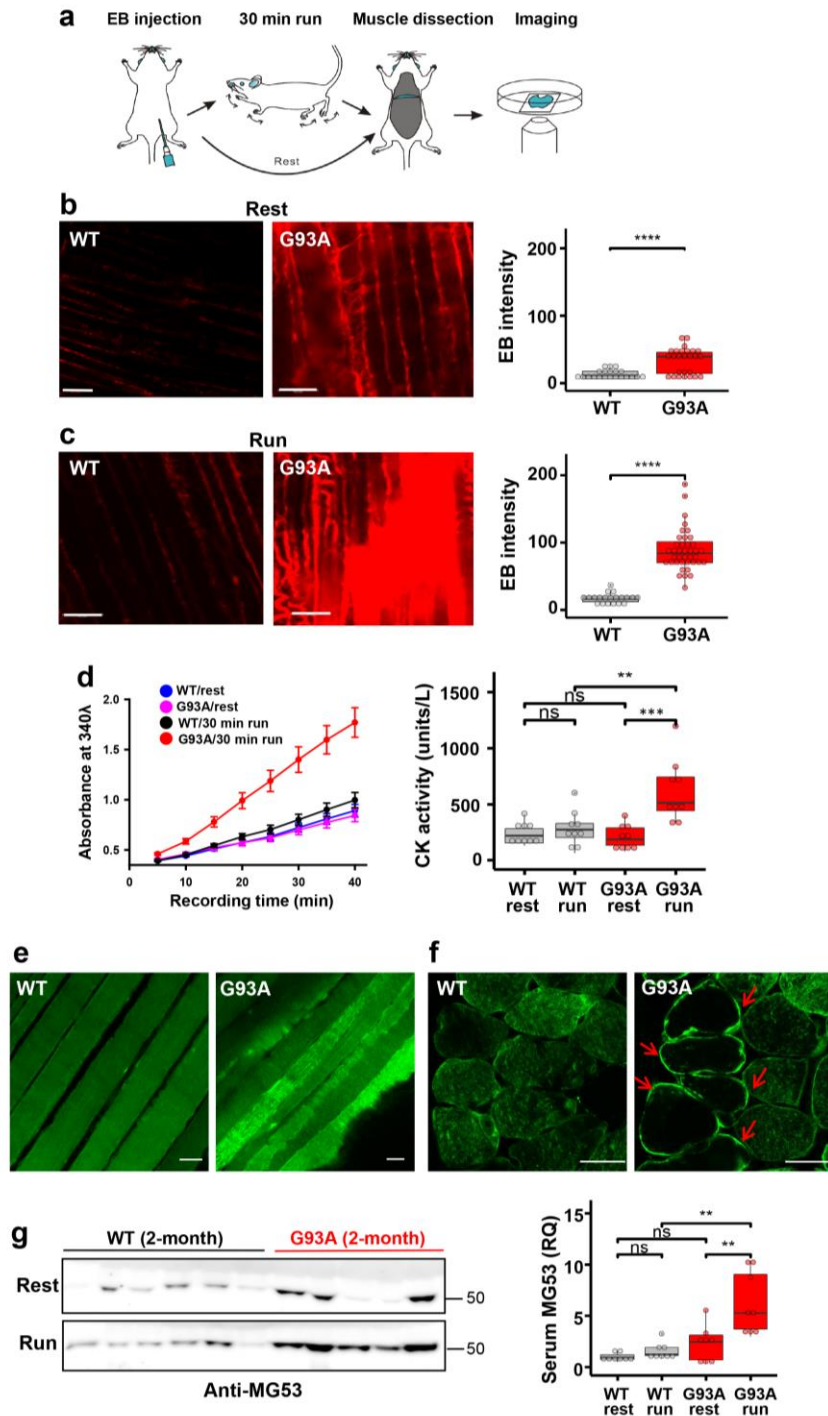

1 **Figure 1. Diaphragm susceptibility to membrane injury is an early pathological event in**  
2 **ALS.**

3 **(a)** Schematic diagram for evaluation of diaphragm integrity in ALS mice. **(b)** Compared with WT  
4 mice, diaphragm muscle derived from G93A littermates (2-month old) showed increased EB  
5 intensity without running (WT:  $12.8 \pm 1.5$ , n = 21 from 4 mice; G93A:  $33.4 \pm 3.7$ , n = 26 from 2  
6 mice, \*\*\*\* P < 0.0001). Scale bars: 20  $\mu$ m. **(c)** 30 min downhill running caused drastic elevation  
7 of EB in diaphragm derived from the G93A mice (WT  $17.30 \pm 1.69$ , n = 20 from 3 mice; G93A:  
8  $88.49 \pm 4.92$ , n = 39 from 4 mice, \*\*\*\* P < 0.0001). Scale bars: 20  $\mu$ m. **(d)** Quantification of CK  
9 activity in serum samples derived from G93A and WT littermate mice (2- month old) before and  
10 after 30 min running. n = 9 for each group, \*\*P < 0.01, \*\*\*P < 0.001, ns: not significant. **Left**  
11 **panel** shows the time-dependent reading of the absorbance (at 340 nm) of serum samples in a 96-  
12 well plate; **Right panel** shows the calculated CK activity derived from the absorbance reading (see  
13 Method Section). **(e)** Immunostaining revealed homogenous patterns of MG53 in WT diaphragm,  
14 whereas the G93A diaphragm showed aggregation and patching patterns of MG53 after running,  
15 indicative of membrane injury. Scale bars: 20  $\mu$ m. **(f)** Cross sectional staining revealed “ring-like”  
16 patterns of MG53 in G93A diaphragm (*arrows*), which were less frequent in WT diaphragm. Scale  
17 bars: 20  $\mu$ m. **(g)** Immunoblotting of serum MG53 levels in WT and G93A littermate mice (2-  
18 month old) before (rest) and after 30 min running (run). Ponceau S staining indicated equal loading  
19 of the serum samples (see **Supplementary Fig. 2**). WT mice showed no significant changes in the  
20 serum MG53 level before and after running (WT/rest:  $1.00 \pm 0.14$  vs WT/run:  $1.58 \pm 0.28$ , ns: P >  
21 0.05). After running, G93A mice showed significant increase of the serum MG53 level (G93A/rest  
22  $2.29 \pm 0.63$  vs G93A/run:  $6.21 \pm 1.09$ , \*\*P < 0.01). n = 8/group.

23  
24

1 **Fig. 2. Disruption of physiological injury-repair process by MG53 at NMJ upon ALS**  
 2 **progression.**

3

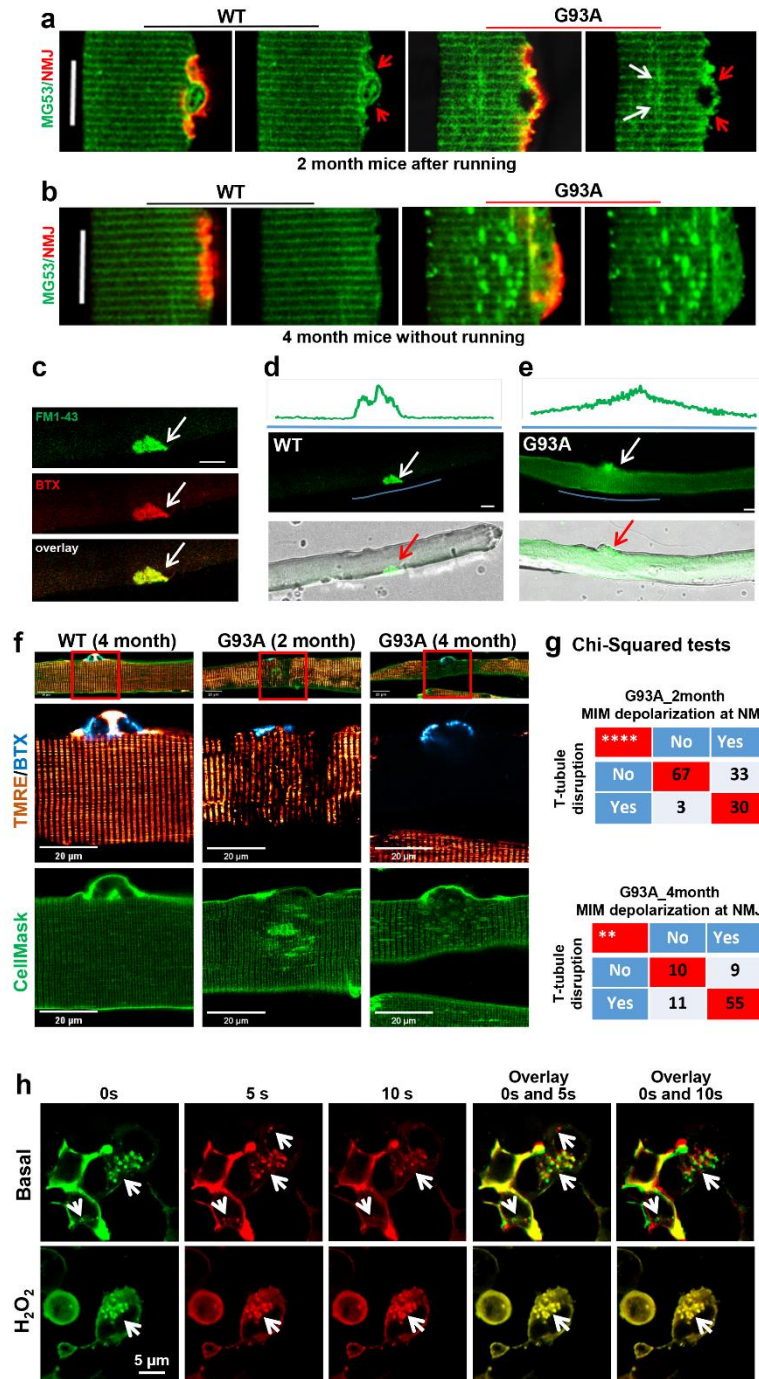

4

1 **Fig. 2. Disruption of physiological injury-repair process by MG53 at NMJ upon ALS**  
2 **progression.**

3 (a) FDB myofibers, obtained from WT and G93A mice (2-month old) subjected to 30 min running,  
4 were co-stained with MG53 antibody (green) and BTX (red). MG53 formed patches covering the  
5 NMJ site in both WT and G93A myofibers. However, intracellular MG53 aggregates start to  
6 appear near the site of NMJ in the G93A myofibers. Scale bars: 20  $\mu$ m. (b) FDB myofiber derived  
7 from G93A mice at the advanced stage of ALS (4-month old) displayed extensive MG53  
8 aggregates near NMJ without running. FDB myofiber derived from WT littermates showed a  
9 uniform pattern of MG53. Scale bars: 20  $\mu$ m. (c) FM 1-43 and BTX co-localized at the NMJ of  
10 FDB myofibers (white arrows). (d) No intracellular FM 1-43 fluorescence was observed in the  
11 WT myofiber at 20 min after incubation with FM 1-43. (e) FM1-43 entered the G93A myofiber  
12 via the NMJ region. Green line highlights the region for fluorescence intensity profiling. Scale  
13 bars: 20  $\mu$ m. (f) FDB myofibers were loaded with BTX (cyan), TMRE (red) and CellMask (green)  
14 simultaneously. At the site of NMJ, mitochondria depolarization (loss of TMRE fluorescence)  
15 occurred in myofibers derived from both 2-month and 4-month old G93A mice, accompanied by  
16 disrupted T-tubule network (marked by CellMask). Normal mitochondria and organized T-tubule  
17 network were detected at the site of NMJ of WT myofiber. Scale bar: 20  $\mu$ m. (g) Chi-Square tests  
18 indicate positive correlations between mitochondrial inner membrane (MIM) depolarization and  
19 T-tubule disorganization at the site of NMJ of G93A mice at both 2 months and 4 months of age  
20 (\*\*P < 0.01, \*\*\*\*P < 0.0001, 3 mice/group). (h) The representative time-lapse images of C2C12  
21 cells with overexpression of GFP-MG53 in the presence and absence (basal) of 1 mM H<sub>2</sub>O<sub>2</sub>. The  
22 overlay images were generated using images at 0s and 5s, or 0s and 10s. White arrows indicate  
23 GFP-MG53 vesicles.

24  
25



1 **Fig. 3. Impaired MG53 membrane repair function is a common pathological feature of ALS.**  
2

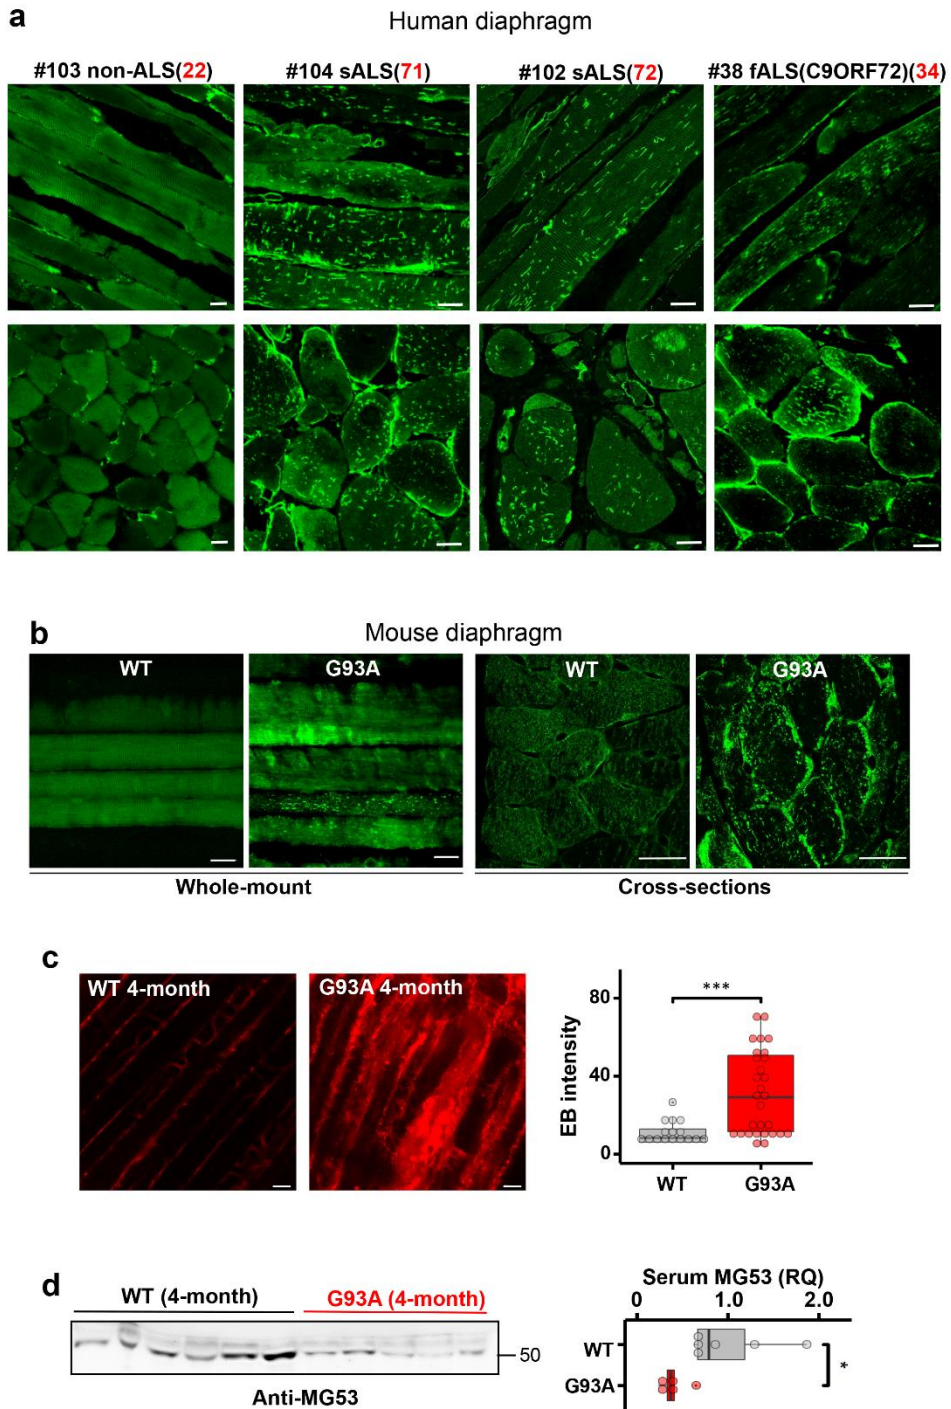

3



1 **Fig. 3. Impaired MG53 membrane repair function is a common pathological feature of ALS**  
2 **(a)** Longitudinal (top panels) and cross-sectional (bottom panels) staining of MG53 demonstrated  
3 uniform patterns in non-ALS human diaphragm (left); whereas human ALS diaphragms (sALS:  
4 sporadic ALS: fALS: familial ALS) displayed extensive intracellular aggregates of MG53. The  
5 age at the death was indicated in red fonts. Scale bars: 20  $\mu\text{m}$ . **(b)** Diaphragm muscle derived from  
6 a 4-month old G93A mouse (post-ALS onset) also showed intracellular aggregates of MG53. **(c)**  
7 Evaluation of the diaphragm muscle cell membrane integrity using EB dye in 4-month old G93A  
8 and WT mice at rest. The G93A diaphragm showed enhanced EB accumulation (G93A:  $31.1 \pm$   
9  $4.0$ ,  $n = 29$  from 3 mice vs WT:  $10.9 \pm 1.6$ ,  $n = 16$  from 2 mice,  $***P < 0.001$ ). Scale bars: 20  $\mu\text{m}$ .  
10 **(d)** G93A mice at the age of 4 months without running showed significantly lower levels of the  
11 serum MG53 compared with WT littermates (G93A,  $n = 5$ ; WT,  $n = 6$ ,  $*P < 0.05$ ). Scale bars: 20  
12  $\mu\text{m}$ .  
13

1 **Fig. 4. rhMG53 preserved membrane integrity of the diaphragm in G93A mice.**

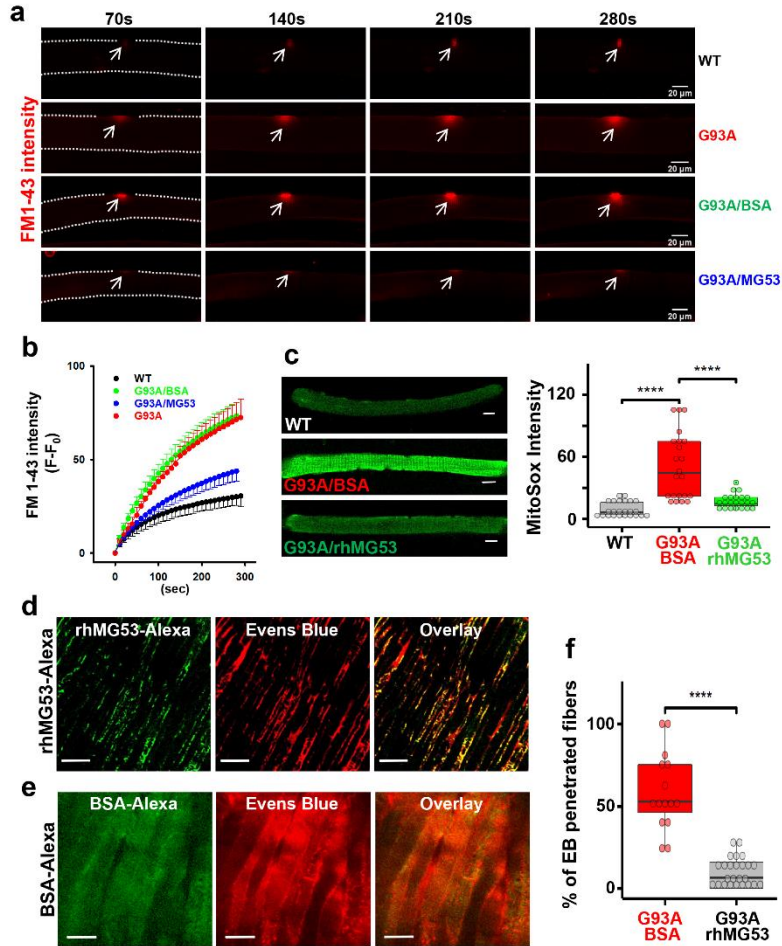

2

3

1 **Fig. 4. rhMG53 preserved membrane integrity of the diaphragm in G93A mice.**

2 (a) Time-lapse recordings of FM 1-43 accumulation in FDB myofibers after laser-induced  
3 membrane damage. The dashed lines highlight the myofiber outline. (b) Plotting of FM 1-43  
4 intensity inside FDB myofibers over time after laser-induced membrane injury. Between G93A  
5 and WT (n = 6-9 myofibers/group; P < 0.001), and between G93A/BSA (9 myofibers) and  
6 G93A/rhMG53 (10 myofibers) (P < 0.001). (c) Live WT and G93A FDB myofibers pre-treated  
7 with rhMG53 (2 µg/ml) or BSA (2 µg/ml, as control) were loaded with MitoSox Red for evaluating  
8 the mitochondrial superoxide production. rhMG53 treatment significantly reduced mitochondrial  
9 superoxide level in G93A FDB myofibers (WT, n = 24; G93A+BSA, n = 22; G93A + rhMG53, n  
10 = 22, \*\*\*\*P < 0.0001). Scale bars: 20 µm. (d) Exercise-induced accumulation of EB in diaphragm  
11 derived from G93A mice (2-month old) was reduced with IV administration of rhMG53-Alexa (2  
12 mg/kg). rhMG53-Alexa targeted to the sarcolemma of the diaphragm. Scale bars: 20 µm. (e)  
13 Diaphragm derived from G93A mice receiving BSA-Alexa showed extensive accumulation of EB.  
14 BSA-Alexa did not target to the sarcolemma. Scale bars: 20 µm. (f) Percentage of myofibers with  
15 EB penetration was significantly reduced with administration of rhMG53-Alexa (n = 14 for BSA-  
16 Alexa488, n = 25 for rhMG53-Alexa488 from 3 pair of G93A mice, \*\*\*\*P < 0.0001).

17

- 1 **Fig. 5. Systemic application of rhMG53 preserved NMJ integrity and promoted motor**
- 2 **neuron survival in ALS mice.**

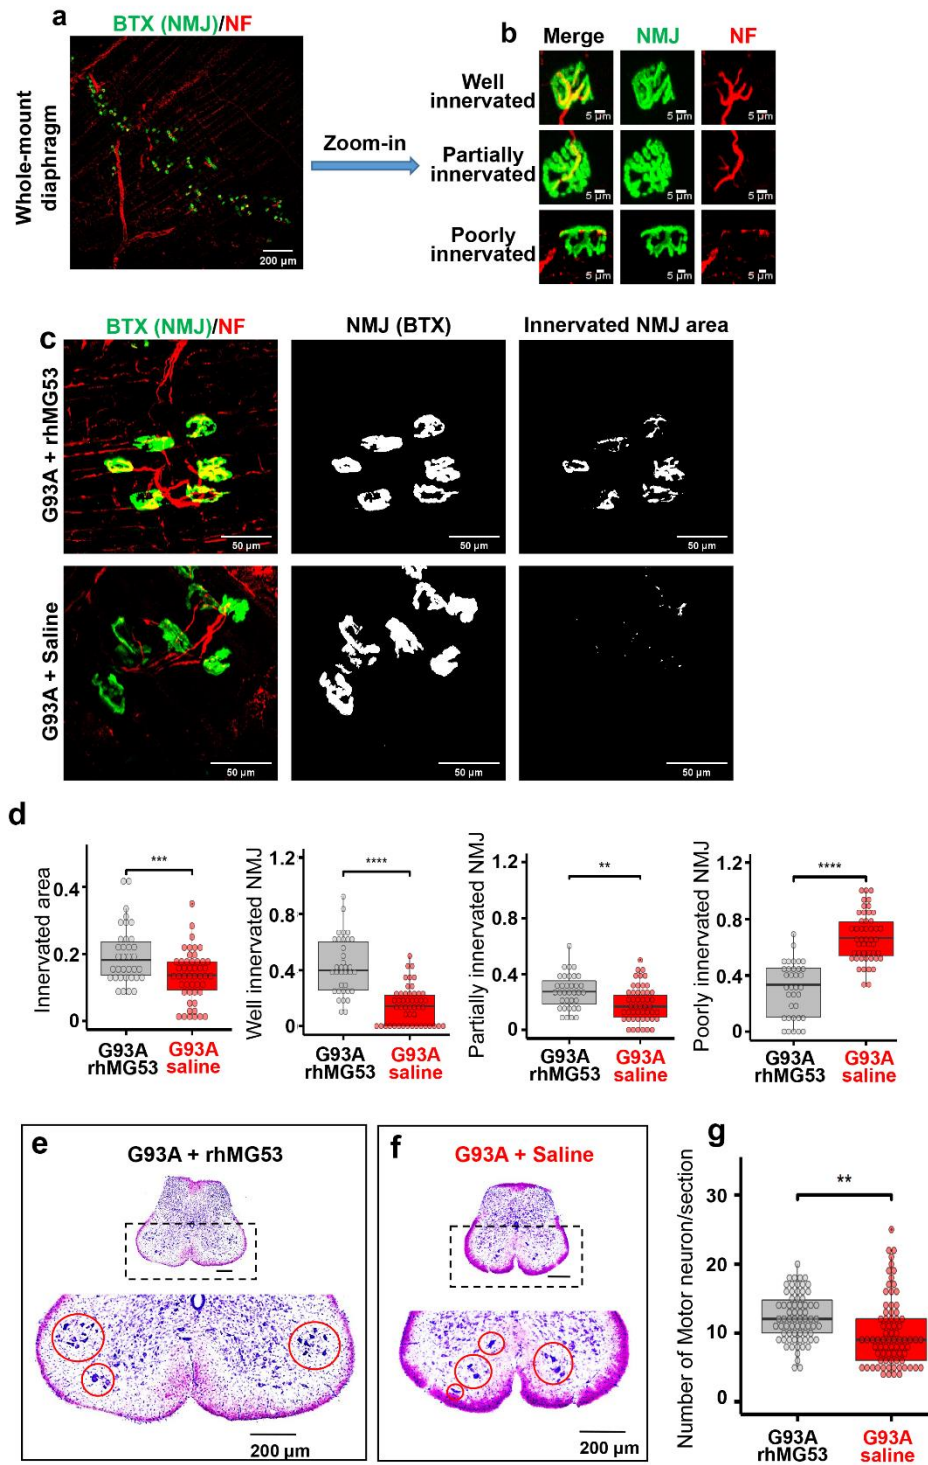

1 **Fig. 5. Systemic application of rhMG53 preserved NMJ integrity and promoted motor**  
2 **neuron survival in ALS mice.**

3 **(a)** Whole-mount fixed diaphragm muscle stained with the NF antibody (red) for marking axonal  
4 terminals and BTX (green) for detecting NMJ. **(b)** Z-stack images of well (the ratio of innervated  
5 area >20%), partially (the ratio of innervated area between 10% and 20%), and poorly innervated  
6 NMJs (the ratio of innervated area < 10%) in diaphragm muscle. **(c)** Z-stack images of diaphragm  
7 muscle from G93A mice receiving 2-week rhMG53 treatment or saline-control (*left panels*). The  
8 area of individual NMJ defined by BTX was presented (*central panels*). The innervated area of  
9 NMJ was defined by the area overlapping with NF (*right panels*). **(d)** Comparing the ratio of  
10 innervated NMJ area in rhMG53 (n = 39, 4 mice) and saline (n = 45, 5 mice) treated diaphragm  
11 muscles of G93A littermate mice, as well as the ratio of well, partially, poorly innervated NMJs.  
12 rhMG53 treatment significantly preserved the innervation of NMJ in diaphragm muscle of G93A  
13 littermate mice. \*\*P < 0.01, \*\*\*P < 0.001, \*\*\*\*P < 0.0001. **(e, f)** Images of the lumbar spinal cord  
14 section of G93A mice (with 2-weeks of rhMG53 or saline treatment from the age of 3 months).  
15 **(g)** The number of surviving motor neurons per section in G93A littermate mice after two-weeks  
16 of treatment with rhMG53 ( $12.2 \pm 0.4$ ) or saline ( $10.1 \pm 0.5$ ) (rhMG53, n = 70 spinal cord sections;  
17 saline, n = 77 spinal cord sections; 4 pairs of G93A mice per cohort, \*\* P < 0.01).

18

1 **Fig. 6. rhMG53 alleviates disease progression and extends the life span of G93A mice.**  
 2  
 3

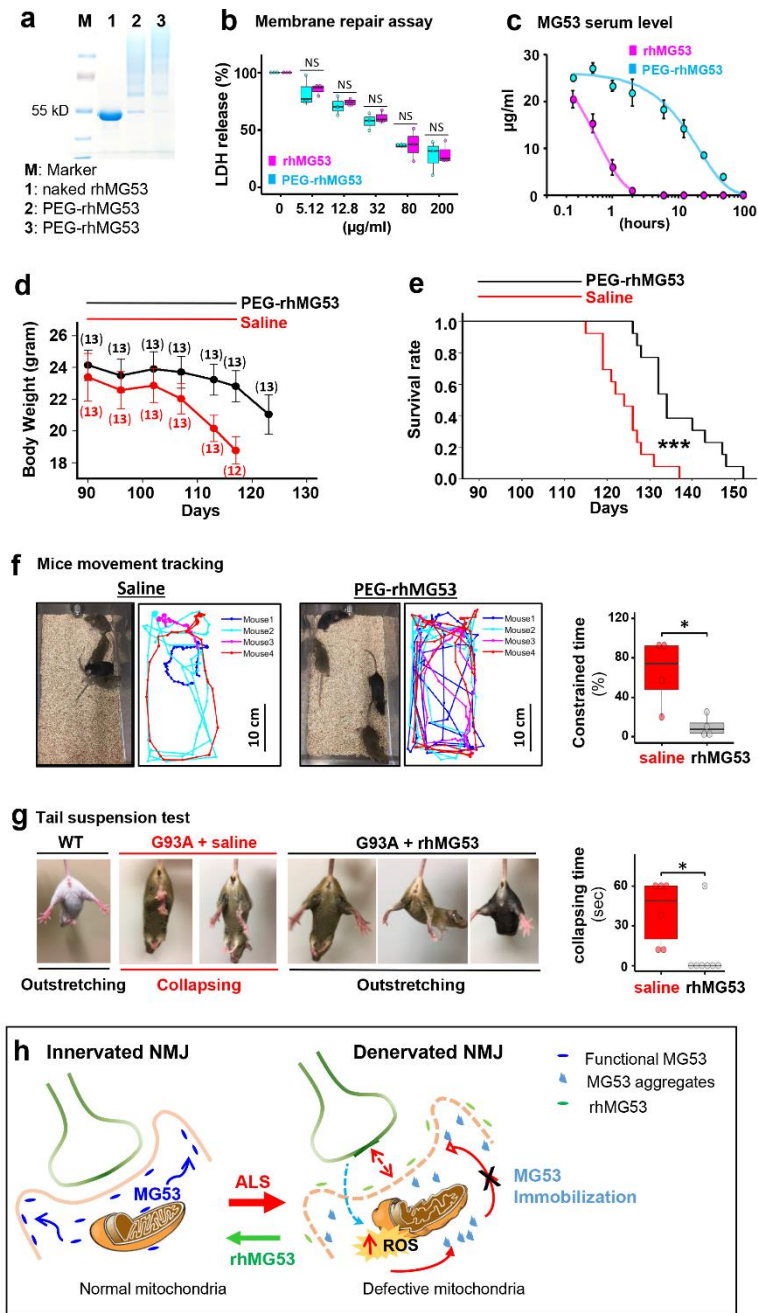

4

1 **Fig. 6. rhMG53 alleviates disease progression and extends the life span of G93A mice.**

2 (a) PEGylation of rhMG53 is successful based on the oligomerization pattern of the protein  
3 running on SDS-PAGE. Lanes 2 and 3 represent two independent rhMG53 PEGylation  
4 experiments. (b) The chemical modification did not affect the membrane repair function of rhM53  
5 as there were no difference in EC<sub>50</sub> of LDH release from the cultured C2C12 cells following a  
6 mechanical membrane damage with glass beads between the rhMG53 and PEG-rhMG53 (n = 3  
7 independent experiments). (c) Pharmacokinetic (PK) assessment revealed that PEGylation  
8 increased serum half-life of rhMG53 in rats from 0.5 hour (rhMG53, n = 4) to 12 hours (PEG-  
9 rhMG53, n = 3). (d) Bodyweight changes of G93A mice receiving PEG-rhMG53 or saline  
10 treatment. The numbers of mice included in each data point were indicated on the plot. (e) Survival  
11 curve of G93A mice with one-month PEG-rhMG53 or saline treatment. The endpoint (death) of a  
12 G93A mouse was defined by the loss of righting reflex within 30 sec when the mouse was place  
13 on its side. (n = 13 pairs of G93A littermates, \*\*\*P < 0.001). (f) Mice movement tracking was  
14 performed using 1-minute video recording files of the saline and PEG-rhMG53 treated mice  
15 (**Supplementary Movie 1**). Percentage of time showing constrained movement is defined as the  
16 percentage of the recording time in which the mouse moved at less than 1 cm/sec speed for 3 sec  
17 or longer. (g) Representative photos and Collapsing time measurement results of tail suspension  
18 tests of G93A mice at the age of 104 day after receiving rhMG53 (n = 7 mice) or saline (n = 6  
19 mice) for 2 weeks. An age-matched WT mouse was included for comparison (\* P < 0.05). (h)  
20 Proposed mechanisms underlying membrane repair defects at NMJ of ALS.

21
